# Supplementary material for: Combining ability and gene action for grain yield and biofortification traits in pearl millet [Pennisetum glaucum (L.) R. Br.]: Implications for breeding high-yielding nutrient-dense hybrids
Source: Research Square preprint supplement (doi:10.21203/rs.3.rs-8583609/v1), 2026-01-20
Supplement: Supplementary file 1 [file cdf55888c1760ea78bd661e9.docx]

**Table S1.** Per se performance of parents and F₁ hybrids for yield and biofortification traits in pearl millet

| **Genotype** | **DF** | | | **DM** | | | **PH** | | | **Tillers** | | | **PL** | | | **PG** | | | **TW** | | |
| --- | --- | --- | --- | --- | --- | --- | --- | --- | --- | --- | --- | --- | --- | --- | --- | --- | --- | --- | --- | --- | --- |
|  | **E1** | **E2** | **Pooled** | **E1** | **E2** | **Pooled** | **E1** | **E2** | **Pooled** | **E1** | **E2** | **Pooled** | **E1** | **E2** | **Pooled** | **E1** | **E2** | **Pooled** | **E1** | **E2** | **Pooled** |
| ***Parents*** |  |  |  |  |  |  |  |  |  |  |  |  |  |  |  |  |  |  |  |  |  |
| RIB-9178 | 51.00 | 49.67 | 50.33 | 79.00 | 73.82 | 76.41 | 166.33 | 160.00 | 163.17 | 1.18 | 1.24 | 1.21 | 23.03 | 17.13 | 20.08 | 8.54 | 6.82 | 7.68 | 6.77 | 5.99 | 6.38 |
| RIB-9184 | 53.33 | 52.00 | 52.67 | 82.67 | 77.48 | 80.07 | 183.00 | 182.67 | 182.83 | 1.74 | 1.91 | 1.82 | 26.93 | 26.01 | 26.47 | 6.38 | 6.17 | 6.27 | 9.17 | 7.09 | 8.13 |
| RIB-9185 | 54.67 | 49.00 | 51.83 | 83.67 | 74.15 | 78.91 | 198.00 | 197.00 | 197.50 | 1.64 | 2.12 | 1.88 | 26.17 | 27.27 | 26.72 | 7.09 | 7.99 | 7.54 | 9.67 | 8.65 | 9.16 |
| RIB-9205 | 48.00 | 49.00 | 48.50 | 74.67 | 83.15 | 78.91 | 111.00 | 112.33 | 111.67 | 1.87 | 1.89 | 1.88 | 15.23 | 13.60 | 14.42 | 6.31 | 6.19 | 6.25 | 5.40 | 5.55 | 5.48 |
| RIB-15131 | 64.33 | 56.67 | 60.50 | 94.33 | 83.82 | 89.07 | 195.00 | 191.67 | 193.33 | 2.03 | 1.89 | 1.96 | 15.37 | 14.93 | 15.15 | 7.69 | 7.31 | 7.50 | 7.67 | 7.15 | 7.41 |
| RIB-16300 | 49.00 | 53.00 | 51.00 | 76.00 | 80.15 | 78.07 | 175.67 | 179.00 | 177.33 | 2.16 | 2.03 | 2.09 | 19.27 | 18.57 | 18.92 | 6.84 | 6.45 | 6.64 | 7.17 | 8.25 | 7.71 |
| RIB-16324 | 59.00 | 56.00 | 57.50 | 87.67 | 82.82 | 85.24 | 132.00 | 129.67 | 130.83 | 1.87 | 1.63 | 1.75 | 15.10 | 12.87 | 13.98 | 5.86 | 5.27 | 5.56 | 5.73 | 5.49 | 5.61 |
| J-2340 | 59.00 | 55.67 | 57.33 | 88.00 | 83.15 | 85.57 | 172.00 | 163.67 | 167.83 | 1.14 | 1.15 | 1.14 | 21.47 | 18.26 | 19.86 | 7.68 | 7.09 | 7.39 | 5.20 | 5.39 | 5.29 |
| 20K86 | 58.33 | 55.00 | 56.67 | 87.33 | 80.15 | 83.74 | 156.00 | 145.33 | 150.67 | 1.61 | 1.57 | 1.59 | 18.60 | 20.58 | 19.59 | 8.00 | 7.71 | 7.85 | 6.83 | 6.82 | 6.83 |
| RIB-192 | 55.00 | 53.00 | 54.00 | 83.00 | 79.82 | 81.41 | 179.00 | 181.00 | 180.00 | 2.36 | 1.66 | 2.01 | 29.17 | 24.88 | 27.02 | 6.38 | 6.45 | 6.42 | 6.67 | 6.72 | 6.69 |
| ***F₁'s (Crosses)*** |  |  |  |  |  |  |  |  |  |  |  |  |  |  |  |  |  |  |  |  |  |
| RIB-9178 x RIB-9184 | 54.67 | 51.67 | 53.17 | 82.54 | 77.22 | 79.88 | 186.67 | 180.12 | 183.39 | 1.17 | 1.10 | 1.13 | 26.73 | 25.55 | 26.14 | 7.12 | 7.35 | 7.23 | 9.37 | 6.32 | 7.84 |
| RIB-9178 x RIB-9185 | 54.00 | 50.00 | 52.00 | 81.56 | 79.55 | 80.55 | 190.73 | 203.12 | 196.92 | 1.22 | 1.20 | 1.21 | 22.20 | 21.30 | 21.75 | 7.61 | 7.05 | 7.33 | 7.50 | 8.95 | 8.22 |
| RIB-9178 x RIB-9205 | 45.33 | 43.00 | 44.17 | 71.46 | 68.22 | 69.84 | 162.45 | 156.27 | 159.36 | 1.34 | 1.45 | 1.40 | 24.10 | 23.00 | 23.55 | 7.37 | 8.19 | 7.78 | 8.83 | 8.28 | 8.56 |
| RIB-9178 x RIB-15131 | 53.33 | 49.67 | 51.50 | 81.22 | 76.55 | 78.89 | 215.34 | 204.60 | 209.97 | 3.01 | 2.07 | 2.54 | 22.23 | 21.37 | 21.80 | 9.33 | 7.15 | 8.24 | 8.30 | 8.55 | 8.42 |
| RIB-9178 x RIB-16300 | 47.00 | 45.00 | 46.00 | 74.00 | 70.22 | 72.11 | 213.67 | 186.12 | 199.89 | 2.08 | 2.05 | 2.06 | 21.77 | 20.41 | 21.09 | 8.58 | 8.78 | 8.68 | 8.27 | 8.32 | 8.29 |
| RIB-9178 x RIB-16324 | 54.67 | 52.00 | 53.33 | 83.67 | 78.55 | 81.11 | 236.67 | 229.12 | 232.89 | 1.69 | 1.56 | 1.62 | 20.99 | 19.52 | 20.26 | 7.89 | 8.18 | 8.04 | 7.80 | 7.78 | 7.79 |
| RIB-9178 x J-2340 | 48.00 | 46.00 | 47.00 | 75.00 | 72.55 | 73.78 | 212.33 | 203.79 | 208.06 | 1.23 | 1.35 | 1.29 | 27.47 | 25.67 | 26.57 | 8.66 | 7.59 | 8.12 | 8.80 | 7.45 | 8.12 |
| RIB-9178 x 20K86 | 48.33 | 45.67 | 47.00 | 75.33 | 71.22 | 73.28 | 214.00 | 204.45 | 209.23 | 1.54 | 1.44 | 1.49 | 21.77 | 20.81 | 21.29 | 7.58 | 7.23 | 7.40 | 8.27 | 8.32 | 8.29 |
| RIB-9178 x RIB-192 | 49.00 | 47.00 | 48.00 | 76.00 | 73.55 | 74.78 | 218.55 | 210.71 | 214.63 | 2.07 | 2.00 | 2.03 | 28.37 | 26.46 | 27.41 | 8.42 | 8.01 | 8.21 | 10.73 | 7.88 | 9.31 |
| RIB-9184 x RIB-9185 | 42.33 | 43.00 | 42.67 | 67.33 | 67.22 | 67.28 | 192.67 | 187.79 | 190.23 | 1.62 | 1.76 | 1.69 | 29.20 | 26.48 | 27.84 | 6.49 | 5.74 | 6.11 | 8.23 | 8.92 | 8.57 |
| RIB-9184 x RIB-9205 | 39.00 | 41.00 | 40.00 | 63.00 | 65.22 | 64.11 | 175.97 | 161.12 | 168.54 | 2.07 | 1.93 | 2.00 | 25.47 | 25.13 | 25.30 | 6.16 | 6.12 | 6.14 | 9.67 | 7.95 | 8.81 |
| RIB-9184 x RIB-15131 | 51.67 | 49.00 | 50.33 | 79.67 | 76.22 | 77.94 | 211.33 | 192.12 | 201.73 | 1.79 | 1.77 | 1.78 | 23.80 | 22.40 | 23.10 | 7.46 | 7.00 | 7.23 | 8.50 | 9.78 | 9.14 |
| RIB-9184 x RIB-16300 | 41.00 | 49.67 | 45.33 | 66.00 | 66.55 | 66.28 | 197.00 | 172.45 | 184.73 | 2.01 | 2.04 | 2.02 | 28.37 | 27.18 | 27.78 | 6.49 | 6.11 | 6.30 | 9.27 | 7.55 | 8.41 |
| RIB-9184 x RIB-16324 | 38.67 | 41.00 | 39.83 | 62.67 | 65.22 | 63.94 | 194.67 | 193.45 | 194.06 | 1.90 | 2.00 | 1.95 | 25.24 | 25.17 | 25.20 | 5.83 | 6.58 | 6.21 | 9.77 | 8.32 | 9.04 |
| RIB-9184 x J-2340 | 54.00 | 41.67 | 47.83 | 82.00 | 77.43 | 79.72 | 174.67 | 203.45 | 189.06 | 1.55 | 1.82 | 1.69 | 23.35 | 22.10 | 22.72 | 5.92 | 5.86 | 5.89 | 6.70 | 8.75 | 7.73 |
| RIB-9184 x 20K86 | 47.67 | 46.00 | 46.83 | 73.67 | 72.55 | 73.11 | 233.00 | 222.79 | 227.89 | 1.52 | 1.75 | 1.64 | 23.60 | 23.13 | 23.37 | 6.53 | 6.00 | 6.26 | 8.27 | 6.32 | 7.29 |
| RIB-9184 x RIB-192 | 50.33 | 47.00 | 48.67 | 77.33 | 68.55 | 72.94 | 216.00 | 206.79 | 211.39 | 2.11 | 2.03 | 2.07 | 34.20 | 31.17 | 32.68 | 6.38 | 6.93 | 6.66 | 8.77 | 7.32 | 8.04 |
| RIB-9185 x RIB-9205 | 43.00 | 43.00 | 43.00 | 68.00 | 76.88 | 72.44 | 168.67 | 176.12 | 172.39 | 3.00 | 2.56 | 2.78 | 23.10 | 21.93 | 22.52 | 6.66 | 6.67 | 6.66 | 8.67 | 8.38 | 8.52 |
| RIB-9185 x RIB-15131 | 54.33 | 54.00 | 54.17 | 82.33 | 72.55 | 77.44 | 221.00 | 224.12 | 222.56 | 1.50 | 1.49 | 1.50 | 25.33 | 24.40 | 24.87 | 8.69 | 8.11 | 8.40 | 8.67 | 8.08 | 8.38 |
| RIB-9185 x RIB-16300 | 50.33 | 46.67 | 48.50 | 77.33 | 73.55 | 75.44 | 209.33 | 202.12 | 205.73 | 1.93 | 2.27 | 2.10 | 24.83 | 23.53 | 24.18 | 7.69 | 7.12 | 7.41 | 9.77 | 7.88 | 8.83 |
| RIB-9185 x RIB-16324 | 51.00 | 48.00 | 49.50 | 79.00 | 74.55 | 76.78 | 209.67 | 179.45 | 194.56 | 1.96 | 2.36 | 2.16 | 23.53 | 22.73 | 23.13 | 7.14 | 7.46 | 7.30 | 9.27 | 8.82 | 9.04 |
| RIB-9185 x J-2340 | 48.33 | 47.00 | 47.67 | 75.33 | 73.88 | 74.61 | 196.33 | 164.12 | 180.23 | 2.00 | 1.34 | 1.67 | 25.20 | 24.33 | 24.77 | 6.91 | 6.49 | 6.70 | 8.00 | 9.78 | 8.89 |
| RIB-9185 x 20K86 | 51.00 | 47.67 | 49.33 | 79.00 | 75.22 | 77.11 | 190.33 | 149.79 | 170.06 | 1.93 | 1.80 | 1.86 | 26.47 | 26.23 | 26.35 | 7.39 | 6.93 | 7.16 | 7.20 | 8.32 | 7.76 |
| RIB-9185 x RIB-192 | 50.00 | 48.00 | 49.00 | 79.67 | 75.55 | 77.61 | 204.67 | 205.45 | 205.06 | 2.02 | 1.94 | 1.98 | 31.27 | 29.93 | 30.60 | 6.33 | 6.03 | 6.18 | 8.30 | 6.78 | 7.54 |
| RIB-9205 x RIB-15131 | 47.33 | 45.00 | 46.17 | 74.33 | 71.55 | 72.94 | 186.67 | 182.12 | 184.39 | 1.59 | 1.89 | 1.74 | 20.37 | 20.05 | 20.21 | 7.93 | 6.78 | 7.36 | 7.17 | 7.82 | 7.49 |
| RIB-9205 x RIB-16300 | 45.00 | 43.00 | 44.00 | 71.00 | 72.88 | 71.94 | 156.00 | 199.79 | 177.89 | 2.88 | 2.95 | 2.91 | 20.60 | 18.85 | 19.73 | 6.48 | 6.24 | 6.36 | 8.27 | 6.72 | 7.49 |
| RIB-9205 x RIB-16324 | 47.33 | 46.00 | 46.67 | 74.33 | 68.55 | 71.44 | 177.00 | 192.04 | 184.52 | 3.88 | 3.25 | 3.57 | 20.10 | 18.72 | 19.41 | 6.97 | 6.51 | 6.74 | 8.27 | 7.72 | 7.99 |
| RIB-9205 x J-2340 | 46.33 | 43.67 | 45.00 | 73.33 | 69.55 | 71.44 | 194.00 | 184.79 | 189.39 | 2.57 | 2.40 | 2.49 | 23.77 | 21.40 | 22.58 | 7.87 | 7.04 | 7.46 | 7.07 | 7.95 | 7.51 |
| RIB-9205 x 20K86 | 46.00 | 44.00 | 45.00 | 72.00 | 79.22 | 75.61 | 191.33 | 184.45 | 187.89 | 2.69 | 2.90 | 2.80 | 20.87 | 19.65 | 20.26 | 7.07 | 6.73 | 6.90 | 6.83 | 6.32 | 6.57 |
| RIB-9205 x RIB-192 | 50.33 | 47.00 | 48.67 | 77.33 | 78.55 | 77.94 | 172.00 | 158.79 | 165.39 | 3.07 | 2.88 | 2.97 | 28.67 | 26.93 | 27.80 | 6.11 | 5.71 | 5.91 | 7.23 | 6.42 | 6.83 |
| RIB-15131 x RIB-16300 | 52.00 | 48.67 | 50.33 | 79.00 | 76.55 | 77.78 | 196.33 | 192.79 | 194.56 | 1.66 | 2.06 | 1.86 | 18.90 | 17.63 | 18.26 | 7.46 | 6.85 | 7.16 | 7.60 | 6.72 | 7.16 |
| RIB-15131 x RIB-16324 | 54.67 | 51.00 | 52.83 | 83.67 | 74.22 | 78.94 | 172.33 | 180.79 | 176.56 | 1.39 | 1.63 | 1.51 | 18.73 | 17.24 | 17.99 | 7.91 | 7.52 | 7.72 | 7.37 | 7.32 | 7.34 |
| RIB-15131 x J-2340 | 60.00 | 51.00 | 55.50 | 89.00 | 82.55 | 85.77 | 190.33 | 159.45 | 174.89 | 1.32 | 1.32 | 1.32 | 24.00 | 20.85 | 22.43 | 8.79 | 7.10 | 7.94 | 6.50 | 6.78 | 6.64 |
| RIB-15131 x 20K86 | 60.33 | 53.67 | 57.00 | 90.33 | 81.22 | 85.77 | 197.33 | 193.45 | 195.39 | 1.90 | 2.22 | 2.06 | 19.67 | 17.64 | 18.65 | 8.38 | 8.27 | 8.33 | 5.60 | 6.72 | 6.16 |
| RIB-15131 x RIB-192 | 65.33 | 61.00 | 63.17 | 95.33 | 75.55 | 85.44 | 204.33 | 205.79 | 205.06 | 1.89 | 2.12 | 2.01 | 27.10 | 24.95 | 26.02 | 6.91 | 6.40 | 6.65 | 6.67 | 5.22 | 5.94 |
| RIB-16300 x RIB-16324 | 52.00 | 48.00 | 50.00 | 79.00 | 82.55 | 80.78 | 164.64 | 156.45 | 160.55 | 1.84 | 1.73 | 1.79 | 21.40 | 20.53 | 20.97 | 7.76 | 7.06 | 7.41 | 6.80 | 6.78 | 6.79 |
| RIB-16300 x J-2340 | 53.33 | 50.00 | 51.67 | 80.33 | 78.22 | 79.28 | 190.33 | 179.04 | 184.69 | 1.18 | 1.07 | 1.12 | 24.07 | 23.03 | 23.55 | 7.93 | 7.41 | 7.67 | 7.57 | 6.88 | 7.22 |
| RIB-16300 x 20K86 | 54.00 | 49.67 | 51.83 | 82.33 | 77.22 | 79.78 | 214.33 | 197.12 | 205.73 | 2.47 | 1.15 | 1.81 | 21.77 | 21.20 | 21.48 | 8.45 | 7.85 | 8.15 | 7.33 | 6.75 | 7.04 |
| RIB-16300 x RIB-192 | 48.00 | 47.00 | 47.50 | 74.00 | 72.88 | 73.44 | 191.80 | 185.12 | 188.46 | 1.70 | 1.77 | 1.74 | 25.53 | 24.63 | 25.08 | 7.54 | 7.33 | 7.43 | 7.60 | 7.28 | 7.44 |
| RIB-16324 x J-2340 | 51.96 | 48.00 | 49.98 | 79.00 | 74.55 | 76.78 | 208.33 | 200.12 | 204.23 | 1.93 | 1.59 | 1.76 | 25.30 | 24.29 | 24.79 | 8.49 | 7.58 | 8.03 | 8.77 | 7.22 | 7.99 |
| RIB-16324 x 20K86 | 55.67 | 53.00 | 54.33 | 84.83 | 80.22 | 82.52 | 200.67 | 195.12 | 197.89 | 3.47 | 1.55 | 2.51 | 19.70 | 18.63 | 19.17 | 7.98 | 7.39 | 7.68 | 6.83 | 8.22 | 7.52 |
| RIB-16324 x RIB-192 | 60.67 | 54.67 | 57.67 | 90.67 | 90.22 | 90.44 | 215.00 | 210.67 | 212.84 | 2.87 | 1.71 | 2.29 | 26.67 | 25.95 | 26.31 | 7.28 | 6.78 | 7.03 | 5.83 | 6.32 | 6.08 |
| J-2340 x 20K86 | 60.00 | 54.00 | 57.00 | 90.00 | 82.55 | 86.27 | 207.00 | 197.45 | 202.23 | 2.82 | 1.39 | 2.11 | 27.63 | 27.45 | 27.54 | 9.63 | 8.91 | 9.27 | 7.63 | 5.55 | 6.59 |
| J-2340 x RIB-192 | 61.83 | 55.00 | 58.42 | 90.67 | 83.88 | 87.27 | 215.67 | 204.12 | 209.89 | 2.87 | 1.57 | 2.22 | 31.23 | 29.27 | 30.25 | 7.89 | 7.37 | 7.63 | 8.70 | 7.45 | 8.08 |
| 20K86 x RIB-192 | 47.33 | 46.00 | 46.67 | 73.33 | 71.55 | 72.44 | 195.67 | 195.45 | 195.56 | 1.75 | 1.66 | 1.70 | 22.50 | 20.49 | 21.50 | 8.27 | 7.03 | 7.65 | 8.70 | 8.38 | 8.54 |

*E1 = Environment 1; E2 = Environment 2; DF = Days to 50% flowering; DM = Days to maturity; PH = Plant height (cm); PL = Panicle length (cm); PG = Panicle girth (cm); TW = Test weight (g)*

**Table S1.** *(Continued)*

| **Genotype** | **DFY** | | | **GY** | | | **HI** | | | **Fe** | | | **Zn** | | | **Protein** | | |
| --- | --- | --- | --- | --- | --- | --- | --- | --- | --- | --- | --- | --- | --- | --- | --- | --- | --- | --- |
|  | **E1** | **E2** | **Pooled** | **E1** | **E2** | **Pooled** | **E1** | **E2** | **Pooled** | **E1** | **E2** | **Pooled** | **E1** | **E2** | **Pooled** | **E1** | **E2** | **Pooled** |
| ***Parents*** |  |  |  |  |  |  |  |  |  |  |  |  |  |  |  |  |  |  |
| RIB-9178 | 38.49 | 33.59 | 36.04 | 11.62 | 10.01 | 10.82 | 23.24 | 22.98 | 23.11 | 45.93 | 42.93 | 44.43 | 34.85 | 27.81 | 31.33 | 9.65 | 9.19 | 9.42 |
| RIB-9184 | 107.45 | 95.78 | 101.62 | 12.89 | 8.44 | 10.67 | 10.69 | 8.09 | 9.39 | 40.77 | 41.01 | 40.89 | 36.47 | 33.64 | 35.05 | 10.71 | 10.20 | 10.46 |
| RIB-9185 | 66.44 | 76.85 | 71.64 | 10.11 | 11.43 | 10.77 | 11.82 | 12.31 | 12.07 | 43.53 | 47.33 | 45.43 | 34.68 | 30.09 | 32.39 | 9.25 | 9.36 | 9.31 |
| RIB-9205 | 31.93 | 30.44 | 31.18 | 8.74 | 6.71 | 7.72 | 21.51 | 18.13 | 19.82 | 47.04 | 43.13 | 45.09 | 32.80 | 30.45 | 31.63 | 9.40 | 8.95 | 9.18 |
| RIB-15131 | 67.64 | 59.47 | 63.55 | 11.12 | 8.44 | 9.78 | 13.08 | 12.44 | 12.76 | 49.40 | 42.34 | 45.87 | 30.98 | 33.41 | 32.20 | 10.88 | 10.37 | 10.63 |
| RIB-16300 | 77.62 | 70.47 | 74.05 | 12.49 | 9.86 | 11.17 | 13.84 | 12.31 | 13.07 | 28.92 | 25.62 | 27.27 | 22.97 | 25.55 | 24.26 | 10.37 | 9.88 | 10.12 |
| RIB-16324 | 74.47 | 65.44 | 69.96 | 10.15 | 11.32 | 10.73 | 11.99 | 9.48 | 10.74 | 43.29 | 36.67 | 39.98 | 28.30 | 20.78 | 24.54 | 9.52 | 9.07 | 9.29 |
| J-2340 | 47.55 | 44.28 | 45.91 | 11.60 | 7.64 | 9.62 | 19.61 | 14.81 | 17.21 | 28.33 | 21.82 | 25.07 | 24.23 | 22.85 | 23.54 | 9.32 | 9.43 | 9.37 |
| 20K86 | 66.22 | 55.49 | 60.85 | 12.85 | 9.97 | 11.41 | 16.27 | 15.34 | 15.80 | 43.09 | 39.55 | 41.32 | 27.45 | 28.60 | 28.03 | 9.36 | 9.47 | 9.41 |
| RIB-192 | 85.22 | 59.05 | 72.14 | 8.90 | 6.09 | 7.49 | 9.43 | 9.35 | 9.39 | 22.74 | 27.70 | 25.22 | 23.72 | 22.25 | 22.98 | 9.16 | 8.72 | 8.94 |
| ***F₁'s (Crosses)*** |  |  |  |  |  |  |  |  |  |  |  |  |  |  |  |  |  |  |
| RIB-9178 x RIB-9184 | 83.17 | 72.95 | 78.06 | 17.70 | 13.16 | 15.43 | 17.56 | 15.29 | 16.43 | 46.61 | 43.75 | 45.18 | 37.53 | 34.08 | 35.81 | 10.15 | 9.84 | 9.99 |
| RIB-9178 x RIB-9185 | 73.18 | 64.83 | 69.01 | 15.03 | 10.99 | 13.01 | 17.13 | 14.51 | 15.82 | 51.16 | 47.51 | 49.34 | 36.95 | 30.80 | 33.88 | 9.30 | 9.01 | 9.15 |
| RIB-9178 x RIB-9205 | 72.66 | 63.80 | 68.23 | 12.05 | 8.32 | 10.19 | 14.23 | 11.50 | 12.86 | 41.21 | 36.73 | 38.97 | 33.37 | 28.01 | 30.69 | 8.82 | 8.54 | 8.68 |
| RIB-9178 x RIB-15131 | 160.08 | 137.37 | 148.73 | 23.45 | 17.86 | 20.65 | 12.89 | 11.60 | 12.25 | 43.45 | 38.13 | 40.79 | 31.83 | 28.97 | 30.40 | 9.84 | 9.54 | 9.69 |
| RIB-9178 x RIB-16300 | 103.76 | 69.11 | 86.43 | 18.64 | 13.53 | 16.08 | 15.29 | 16.47 | 15.88 | 41.53 | 38.15 | 39.84 | 35.80 | 31.85 | 33.82 | 8.14 | 7.87 | 8.01 |
| RIB-9178 x RIB-16324 | 143.05 | 125.47 | 134.26 | 19.38 | 14.90 | 17.14 | 12.01 | 10.65 | 11.33 | 40.96 | 35.12 | 38.04 | 37.18 | 33.58 | 35.38 | 8.80 | 8.52 | 8.66 |
| RIB-9178 x J-2340 | 133.85 | 116.66 | 125.25 | 20.51 | 17.42 | 18.96 | 13.41 | 13.04 | 13.23 | 35.67 | 32.44 | 34.06 | 36.33 | 36.92 | 36.63 | 10.23 | 10.29 | 10.26 |
| RIB-9178 x 20K86 | 79.63 | 90.31 | 84.97 | 13.78 | 9.31 | 11.54 | 14.92 | 9.35 | 12.14 | 43.20 | 37.14 | 40.17 | 31.22 | 30.22 | 30.72 | 8.43 | 8.46 | 8.45 |
| RIB-9178 x RIB-192 | 164.51 | 143.88 | 154.19 | 17.17 | 12.43 | 14.80 | 9.52 | 7.95 | 8.73 | 31.13 | 30.04 | 30.59 | 29.55 | 28.63 | 29.09 | 9.25 | 9.29 | 9.27 |
| RIB-9184 x RIB-9185 | 132.59 | 117.29 | 124.94 | 16.70 | 13.54 | 15.12 | 11.23 | 10.41 | 10.82 | 48.46 | 41.88 | 45.17 | 38.65 | 36.85 | 37.75 | 10.30 | 10.36 | 10.33 |
| RIB-9184 x RIB-9205 | 66.93 | 89.80 | 78.36 | 14.11 | 10.60 | 12.35 | 17.64 | 10.76 | 14.20 | 56.59 | 50.22 | 53.41 | 39.77 | 32.67 | 36.22 | 10.34 | 10.00 | 10.17 |
| RIB-9184 x RIB-15131 | 102.75 | 56.09 | 79.42 | 21.05 | 16.64 | 18.84 | 17.11 | 22.98 | 20.04 | 48.33 | 44.00 | 46.16 | 40.83 | 36.88 | 38.86 | 12.10 | 11.72 | 11.91 |
| RIB-9184 x RIB-16300 | 98.32 | 87.00 | 92.66 | 10.81 | 8.44 | 9.63 | 9.98 | 8.88 | 9.43 | 38.93 | 42.22 | 40.57 | 35.02 | 33.62 | 34.32 | 10.05 | 9.72 | 9.88 |
| RIB-9184 x RIB-16324 | 96.90 | 87.18 | 92.04 | 10.62 | 7.42 | 9.02 | 9.89 | 7.85 | 8.87 | 44.54 | 39.63 | 42.09 | 39.40 | 33.38 | 36.39 | 11.05 | 10.69 | 10.87 |
| RIB-9184 x J-2340 | 165.08 | 147.89 | 156.49 | 12.94 | 9.42 | 11.18 | 7.26 | 6.03 | 6.64 | 53.11 | 47.43 | 50.27 | 40.17 | 34.10 | 37.13 | 8.50 | 8.21 | 8.35 |
| RIB-9184 x 20K86 | 129.98 | 112.77 | 121.38 | 12.88 | 9.53 | 11.20 | 9.07 | 7.80 | 8.44 | 49.53 | 43.25 | 46.39 | 40.72 | 35.48 | 38.10 | 9.60 | 9.28 | 9.44 |
| RIB-9184 x RIB-192 | 128.04 | 111.32 | 119.68 | 22.85 | 17.22 | 20.04 | 15.20 | 13.38 | 14.29 | 38.78 | 41.42 | 40.10 | 32.78 | 31.43 | 32.11 | 11.50 | 11.58 | 11.54 |
| RIB-9185 x RIB-9205 | 103.76 | 91.82 | 97.79 | 21.57 | 16.76 | 19.17 | 17.29 | 15.50 | 16.39 | 51.52 | 43.53 | 47.53 | 35.50 | 32.95 | 34.22 | 10.43 | 10.50 | 10.46 |
| RIB-9185 x RIB-15131 | 76.80 | 70.25 | 73.53 | 27.12 | 13.75 | 20.43 | 30.72 | 16.72 | 23.72 | 42.01 | 45.45 | 43.73 | 32.72 | 32.23 | 32.48 | 8.81 | 8.61 | 8.71 |
| RIB-9185 x RIB-16300 | 171.26 | 150.07 | 160.66 | 22.71 | 17.10 | 19.90 | 11.76 | 10.33 | 11.05 | 39.25 | 40.39 | 39.82 | 37.40 | 30.62 | 34.01 | 8.34 | 8.15 | 8.24 |
| RIB-9185 x RIB-16324 | 123.28 | 109.45 | 116.37 | 17.11 | 24.12 | 20.62 | 12.23 | 19.58 | 15.91 | 40.14 | 36.78 | 38.46 | 42.25 | 35.86 | 39.06 | 9.21 | 9.01 | 9.11 |
| RIB-9185 x J-2340 | 48.44 | 42.99 | 45.71 | 21.30 | 15.53 | 18.41 | 30.67 | 26.58 | 28.63 | 40.03 | 39.24 | 39.64 | 35.95 | 30.63 | 33.29 | 8.67 | 8.47 | 8.57 |
| RIB-9185 x 20K86 | 90.95 | 79.16 | 85.05 | 19.51 | 14.87 | 17.19 | 17.75 | 15.93 | 16.84 | 50.19 | 43.33 | 46.76 | 36.77 | 31.72 | 34.24 | 8.67 | 8.47 | 8.57 |
| RIB-9185 x RIB-192 | 115.65 | 102.36 | 109.00 | 17.65 | 14.54 | 16.09 | 13.28 | 12.48 | 12.88 | 36.95 | 39.32 | 38.13 | 32.02 | 31.58 | 31.80 | 9.79 | 9.58 | 9.68 |
| RIB-9205 x RIB-15131 | 54.60 | 47.74 | 51.17 | 14.10 | 11.64 | 12.87 | 20.55 | 19.67 | 20.11 | 54.73 | 48.92 | 51.83 | 39.62 | 36.60 | 38.11 | 8.30 | 8.11 | 8.20 |
| RIB-9205 x RIB-16300 | 66.03 | 57.83 | 61.93 | 16.16 | 12.43 | 14.30 | 19.83 | 17.83 | 18.83 | 54.17 | 47.36 | 50.76 | 31.92 | 30.27 | 31.09 | 9.34 | 9.17 | 9.25 |
| RIB-9205 x RIB-16324 | 122.53 | 110.50 | 116.52 | 18.20 | 14.49 | 16.35 | 13.11 | 11.69 | 12.40 | 47.58 | 43.85 | 45.71 | 40.02 | 32.73 | 36.37 | 8.42 | 8.26 | 8.34 |
| RIB-9205 x J-2340 | 119.25 | 103.36 | 111.31 | 15.35 | 11.31 | 13.33 | 11.49 | 9.94 | 10.72 | 56.88 | 51.71 | 54.29 | 34.55 | 32.32 | 33.43 | 11.21 | 11.02 | 11.11 |
| RIB-9205 x 20K86 | 54.79 | 55.22 | 55.01 | 16.49 | 11.75 | 14.12 | 23.34 | 17.55 | 20.44 | 68.36 | 58.23 | 63.30 | 39.45 | 32.93 | 36.19 | 9.04 | 8.87 | 8.96 |
| RIB-9205 x RIB-192 | 99.46 | 84.01 | 91.73 | 12.91 | 8.43 | 10.67 | 11.56 | 9.13 | 10.34 | 40.37 | 32.79 | 36.58 | 34.98 | 30.87 | 32.93 | 9.95 | 9.77 | 9.86 |
| RIB-15131 x RIB-16300 | 99.98 | 89.00 | 94.49 | 19.18 | 14.40 | 16.79 | 16.21 | 13.96 | 15.09 | 44.68 | 36.30 | 40.49 | 28.75 | 30.40 | 29.58 | 10.03 | 9.85 | 9.94 |
| RIB-15131 x RIB-16324 | 65.25 | 48.00 | 56.62 | 19.14 | 14.23 | 16.69 | 22.79 | 23.02 | 22.90 | 36.83 | 32.50 | 34.66 | 26.13 | 26.73 | 26.43 | 9.81 | 9.63 | 9.72 |
| RIB-15131 x J-2340 | 114.27 | 98.83 | 106.55 | 13.98 | 9.30 | 11.64 | 11.03 | 8.68 | 9.85 | 45.49 | 39.39 | 42.44 | 33.35 | 28.70 | 31.03 | 8.65 | 8.48 | 8.57 |
| RIB-15131 x 20K86 | 74.12 | 65.88 | 70.00 | 14.36 | 10.97 | 12.66 | 16.22 | 14.32 | 15.27 | 47.81 | 42.99 | 45.40 | 32.97 | 30.88 | 31.93 | 9.65 | 9.47 | 9.56 |
| RIB-15131 x RIB-192 | 124.13 | 108.73 | 116.43 | 12.45 | 9.65 | 11.05 | 9.12 | 8.14 | 8.63 | 46.59 | 39.78 | 43.19 | 26.47 | 24.18 | 25.32 | 7.98 | 7.82 | 7.90 |
| RIB-16300 x RIB-16324 | 55.34 | 47.98 | 51.66 | 12.84 | 8.43 | 10.63 | 18.92 | 15.02 | 16.97 | 50.63 | 42.60 | 46.61 | 28.57 | 27.52 | 28.04 | 10.43 | 10.25 | 10.34 |
| RIB-16300 x J-2340 | 72.54 | 62.12 | 67.33 | 17.35 | 13.65 | 15.50 | 19.27 | 18.06 | 18.67 | 34.73 | 32.57 | 33.65 | 27.83 | 27.33 | 27.58 | 9.54 | 9.37 | 9.45 |
| RIB-16300 x 20K86 | 78.28 | 68.23 | 73.25 | 31.04 | 26.32 | 28.68 | 28.39 | 27.92 | 28.16 | 41.89 | 46.48 | 44.19 | 29.20 | 25.91 | 27.56 | 9.69 | 9.93 | 9.81 |
| RIB-16300 x RIB-192 | 72.44 | 63.57 | 68.00 | 23.40 | 18.23 | 20.81 | 24.54 | 22.30 | 23.42 | 46.66 | 41.67 | 44.17 | 39.93 | 37.09 | 38.51 | 10.76 | 11.03 | 10.90 |
| RIB-16324 x J-2340 | 97.01 | 84.64 | 90.83 | 18.61 | 14.54 | 16.57 | 16.26 | 14.68 | 15.47 | 36.17 | 31.74 | 33.96 | 26.87 | 29.89 | 28.38 | 9.32 | 9.55 | 9.43 |
| RIB-16324 x 20K86 | 113.97 | 100.55 | 107.26 | 32.05 | 27.09 | 29.57 | 22.05 | 21.14 | 21.59 | 35.10 | 38.00 | 36.55 | 30.83 | 32.72 | 31.77 | 8.21 | 8.40 | 8.31 |
| RIB-16324 x RIB-192 | 241.78 | 192.67 | 217.22 | 25.08 | 20.76 | 22.92 | 9.46 | 9.77 | 9.61 | 31.83 | 31.62 | 31.73 | 27.22 | 26.42 | 26.82 | 7.98 | 8.17 | 8.07 |
| J-2340 x 20K86 | 107.97 | 93.62 | 100.79 | 24.17 | 19.64 | 21.91 | 18.44 | 17.37 | 17.91 | 37.44 | 32.44 | 34.94 | 33.27 | 30.26 | 31.77 | 10.54 | 10.81 | 10.67 |
| J-2340 x RIB-192 | 65.60 | 58.09 | 61.84 | 23.92 | 18.06 | 20.99 | 26.83 | 23.91 | 25.37 | 29.11 | 28.44 | 28.78 | 27.07 | 25.23 | 26.15 | 9.12 | 8.69 | 8.90 |
| 20K86 x RIB-192 | 96.28 | 87.01 | 91.64 | 10.40 | 7.43 | 8.92 | 9.77 | 7.87 | 8.82 | 25.00 | 24.44 | 24.72 | 22.43 | 21.30 | 21.87 | 8.97 | 8.54 | 8.76 |

*DFY = Dry fodder yield (g/plant); GY = Grain yield (g/plant); HI = Harvest index (%); Fe = Iron (ppm); Zn = Zinc (ppm); Protein = Protein content (%)*

**Table S2.** Specific combining ability (SCA) effects for all 45 F₁ crosses in pearl millet

| **Cross** | **DF** | | | **DM** | | | **PH** | | | **Tillers** | | | **PL** | | | **PG** | | | **TW** | | |
| --- | --- | --- | --- | --- | --- | --- | --- | --- | --- | --- | --- | --- | --- | --- | --- | --- | --- | --- | --- | --- | --- |
|  | **E1** | **E2** | **Pooled** | **E1** | **E2** | **Pooled** | **E1** | **E2** | **Pooled** | **E1** | **E2** | **Pooled** | **E1** | **E2** | **Pooled** | **E1** | **E2** | **Pooled** | **E1** | **E2** | **Pooled** |
| RIB-9178 x RIB-9184 | 7.47*** | 5.49*** | 6.48*** | 8.63*** | 6.56*** | 7.59*** | -14.33* | -13.72* | -14.03*** | -0.25* | -0.43*** | -0.34*** | 0.25 | 1.01 | 0.63 | -0.09 | 0.43* | 0.17 | 0.22 | -1.60*** | -0.69*** |
| RIB-9178 x RIB-9185 | 4.50*** | 2.88** | 3.69*** | 4.54* | 6.71*** | 5.63*** | -12.89* | 9.22 | -1.84 | -0.30** | -0.41*** | -0.35*** | -3.42*** | -2.83*** | -3.12*** | -0.26 | -0.49* | -0.38* | -1.49*** | 0.38 | -0.55** |
| RIB-9178 x RIB-9205 | -0.16 | -1.48 | -0.82 | -0.32 | -4.59* | -2.46 | -10.06 | -15.47** | -12.76** | -0.71*** | -0.57*** | -0.64*** | 2.31** | 3.25*** | 2.78*** | -0.18 | 1.07*** | 0.45** | 0.85** | 0.93*** | 0.89*** |
| RIB-9178 x RIB-15131 | -2.33 | -1.70 | -2.02* | -3.01 | 0.60 | -1.21 | 11.25 | 7.99 | 9.62* | 1.52*** | 0.52*** | 1.02*** | 1.00 | 2.16** | 1.58** | 0.69** | -0.58** | 0.06 | 0.41 | 0.98*** | 0.70*** |
| RIB-9178 x RIB-16300 | -1.41 | -2.81* | -2.11* | -1.19 | -3.76* | -2.47 | 17.94** | -3.02 | 7.46 | 0.43*** | 0.42*** | 0.43*** | -0.71 | -0.27 | -0.49 | 0.47* | 1.22*** | 0.84*** | -0.05 | 0.74** | 0.35 |
| RIB-9178 x RIB-16324 | 2.59* | 2.52* | 2.56** | 3.71 | 2.63 | 3.17* | 44.42*** | 42.68*** | 43.55*** | -0.18 | -0.02 | -0.10 | -0.33 | 0.14 | -0.10 | 0.03 | 0.80*** | 0.42** | -0.13 | 0.36 | 0.12 |
| RIB-9178 x J-2340 | -5.51*** | -2.98** | -4.24*** | -6.50** | -3.97* | -5.23*** | 12.58* | 15.09* | 13.84*** | -0.23* | 0.15* | -0.04 | 2.56*** | 3.26*** | 2.91*** | 0.09 | -0.12 | -0.02 | 1.04*** | 0.10 | 0.57** |
| RIB-9178 x 20K86 | -3.94** | -3.48** | -3.71*** | -4.90* | -4.45* | -4.68*** | 12.36* | 15.16** | 13.76*** | -0.22* | -0.00 | -0.11 | -0.33 | -0.06 | -0.20 | -0.97*** | -0.66** | -0.82*** | 0.49 | 0.98*** | 0.73*** |
| RIB-9178 x RIB-192 | -3.76** | -2.89** | -3.33*** | -4.63* | -2.01 | -3.32* | 13.91* | 11.91* | 12.91** | 0.16 | 0.39*** | 0.28*** | 0.21 | 1.15 | 0.68 | 0.64** | 0.72*** | 0.68*** | 2.50*** | 0.71** | 1.61*** |
| RIB-9184 x RIB-9185 | -4.64*** | -2.84** | -3.74*** | -6.41** | -3.61 | -5.01*** | -8.03 | -5.04 | -6.53 | -0.03 | -0.13 | -0.08 | 0.90 | -1.14 | -0.12 | 0.16 | -0.71*** | -0.28 | -1.21*** | 0.22 | -0.50* |
| RIB-9184 x RIB-9205 | -3.97** | -2.20* | -3.08*** | -5.51* | -5.58** | -5.55*** | 6.38 | -9.55 | -1.58 | -0.11 | -0.37*** | -0.24*** | 1.00 | 1.89** | 1.44** | 0.15 | 0.10 | 0.13 | 1.23*** | 0.47 | 0.85*** |
| RIB-9184 x RIB-15131 | -1.47 | -1.09 | -1.28 | -1.30 | 2.28 | 0.49 | 10.17 | -3.41 | 3.38 | 0.18 | -0.06 | 0.06 | -0.11 | -0.30 | -0.21 | 0.37 | 0.36 | 0.37* | 0.16 | 2.08*** | 1.12*** |
| RIB-9184 x RIB-16300 | -4.89*** | 3.13** | -0.88 | -5.92** | -5.42** | -5.67*** | 4.19 | -15.62** | -5.71 | 0.23* | 0.14* | 0.18** | 3.21*** | 3.00*** | 3.10*** | -0.09 | -0.34 | -0.22 | 0.50 | -0.16 | 0.17 |
| RIB-9184 x RIB-16324 | -10.88*** | -7.20*** | -9.04*** | -14.02*** | -8.69*** | -11.36*** | 5.34 | 8.09 | 6.72 | -0.10 | 0.14* | 0.02 | 1.24 | 2.28*** | 1.76*** | -0.49* | 0.30 | -0.10 | 1.39*** | 0.77** | 1.08*** |
| RIB-9184 x J-2340 | 3.02* | -6.03*** | -1.51 | 3.78 | 2.92 | 3.35* | -22.16*** | 15.83** | -3.17 | -0.04 | 0.34*** | 0.15* | -4.24*** | -3.82*** | -4.03*** | -1.10*** | -0.75*** | -0.93*** | -1.51*** | 1.27*** | -0.12 |
| RIB-9184 x 20K86 | -2.08 | -1.87 | -1.97* | -3.29 | -1.11 | -2.20 | 34.29*** | 34.57*** | 34.43*** | -0.36*** | 0.03 | -0.17** | -1.17 | -1.24 | -1.21* | -0.48* | -0.80*** | -0.64*** | 0.04 | -1.15*** | -0.56** |
| RIB-9184 x RIB-192 | 0.10 | -1.62 | -0.76 | -0.03 | -5.00** | -2.52 | 14.28* | 9.06 | 11.67** | 0.08 | 0.14* | 0.11 | 3.37*** | 2.37*** | 2.87*** | 0.15 | 0.74*** | 0.44** | 0.08 | 0.01 | 0.05 |
| RIB-9185 x RIB-9205 | -2.28 | -1.14 | -1.71* | -3.63 | 3.91* | 0.14 | -3.54 | 5.40 | 0.93 | 0.72*** | 0.18* | 0.45*** | -0.50 | -0.90 | -0.70 | -0.01 | 0.02 | 0.00 | 0.39 | 0.25 | 0.32 |
| RIB-9185 x RIB-15131 | -1.11 | 2.97** | 0.93 | -1.75 | -3.57 | -2.66 | 17.22** | 28.53*** | 22.88*** | -0.22* | -0.42*** | -0.32*** | 2.28** | 2.10** | 2.19*** | 0.93*** | 0.84*** | 0.89*** | 0.49 | -0.27 | 0.11 |
| RIB-9185 x RIB-16300 | 2.14 | -0.81 | 0.67 | 2.30 | -0.59 | 0.85 | 13.91* | 13.99* | 13.95*** | 0.05 | 0.29*** | 0.17** | 0.54 | -0.24 | 0.15 | 0.46* | 0.03 | 0.24 | 1.16*** | -0.48 | 0.34 |
| RIB-9185 x RIB-16324 | -0.86 | -1.14 | -1.00 | -0.80 | -1.54 | -1.17 | 17.72** | -5.97 | 5.88 | -0.14 | 0.43*** | 0.15* | 0.40 | 0.26 | 0.33 | 0.16 | 0.54* | 0.35* | 1.05*** | 0.61* | 0.83*** |
| RIB-9185 x J-2340 | -4.95*** | -1.64 | -3.30*** | -6.00** | -2.81 | -4.40** | -3.11 | -23.56*** | -13.34** | 0.31** | -0.22** | 0.05 | -1.52* | -1.17 | -1.35** | -0.78*** | -0.75*** | -0.77*** | -0.05 | 1.65*** | 0.80*** |
| RIB-9185 x 20K86 | -1.05 | -1.14 | -1.10 | -1.07 | -0.62 | -0.85 | -11.00 | -38.48*** | -24.74*** | -0.06 | -0.00 | -0.03 | 2.56*** | 2.27*** | 2.41*** | -0.28 | -0.50* | -0.39* | -0.87** | 0.19 | -0.34 |
| RIB-9185 x RIB-192 | -2.54* | -1.56 | -2.05* | -0.81 | -0.18 | -0.49 | 0.33 | 7.67 | 4.00 | -0.11 | -0.02 | -0.07 | 1.30 | 1.54* | 1.42** | -0.56* | -0.79*** | -0.68*** | -0.23 | -1.17*** | -0.70*** |
| RIB-9205 x RIB-15131 | -4.11** | -3.39** | -3.75*** | -4.52* | -4.54* | -4.53** | 14.00* | 8.69 | 11.34** | -0.66*** | -0.44*** | -0.55*** | 1.15 | 2.13** | 1.64*** | 0.50* | -0.05 | 0.22 | -0.00 | 0.68** | 0.34 |
| RIB-9205 x RIB-16300 | 0.81 | -1.84 | -0.52 | 1.20 | -1.23 | -0.02 | -8.32 | 33.82*** | 12.75** | 0.46*** | 0.55*** | 0.51*** | 0.14 | -0.54 | -0.20 | -0.44* | -0.41* | -0.43** | 0.67* | -0.43 | 0.12 |
| RIB-9205 x RIB-16324 | -0.52 | -0.51 | -0.51 | -0.23 | -7.51*** | -3.87** | 16.17** | 28.78*** | 22.47*** | 1.25*** | 0.89*** | 1.07*** | 0.80 | 0.62 | 0.71 | 0.31 | 0.03 | 0.17 | 1.06*** | 0.73** | 0.89*** |
| RIB-9205 x J-2340 | -2.95* | -2.34* | -2.65** | -2.77 | -7.11*** | -4.94*** | 25.66*** | 19.27** | 22.47*** | 0.35** | 0.42*** | 0.39*** | 0.87 | 0.27 | 0.57 | 0.50* | 0.23 | 0.37* | 0.03 | 1.03*** | 0.53** |
| RIB-9205 x 20K86 | -2.05 | -2.17* | -2.11* | -2.84 | 3.41 | 0.28 | 21.11*** | 18.34** | 19.73*** | 0.17 | 0.68*** | 0.43*** | 0.79 | 0.06 | 0.43 | -0.29 | -0.27 | -0.28 | -0.22 | -0.59* | -0.41* |
| RIB-9205 x RIB-192 | 1.79 | 0.08 | 0.94 | 2.09 | 2.85 | 2.47 | -1.23 | -16.83** | -9.03* | 0.40*** | 0.49*** | 0.45*** | 2.53*** | 2.92*** | 2.72*** | -0.46* | -0.67** | -0.57*** | -0.28 | -0.32 | -0.30 |
| RIB-15131 x RIB-16300 | -2.36 | -3.06** | -2.71** | -3.25 | -0.70 | -1.98 | 0.44 | 1.95 | 1.20 | -0.19 | 0.13 | -0.03 | -1.01 | -1.23 | -1.12* | -0.54* | -0.42* | -0.48** | 0.10 | -0.65* | -0.28 |
| RIB-15131 x RIB-16324 | -3.36** | -2.39* | -2.87*** | -3.35 | -4.98** | -4.17** | -20.08** | -7.34 | -13.71** | -0.68*** | -0.26*** | -0.47*** | -0.02 | -0.31 | -0.16 | 0.17 | 0.42* | 0.29 | 0.25 | 0.11 | 0.18 |
| RIB-15131 x J-2340 | 0.55 | -1.89 | -0.67 | 0.44 | 2.75 | 1.60 | -9.58 | -30.93*** | -20.26*** | -0.34** | -0.19** | -0.27*** | 1.66* | 0.26 | 0.96 | 0.34 | -0.33 | 0.00 | -0.45 | -0.35 | -0.40* |
| RIB-15131 x 20K86 | 2.11 | 0.61 | 1.36 | 3.04 | 2.27 | 2.65 | -4.47 | 2.48 | -1.00 | -0.06 | 0.47*** | 0.20** | 0.14 | -1.40* | -0.63 | -0.05 | 0.65** | 0.30* | -1.36*** | -0.41 | -0.89*** |
| RIB-15131 x RIB-192 | 6.63*** | 7.19*** | 6.91*** | 7.63*** | -3.29 | 2.17 | -0.47 | 5.30 | 2.41 | -0.21* | 0.21** | -0.00 | 1.52* | 1.48* | 1.50** | -0.75*** | -0.61** | -0.68*** | -0.76* | -1.74*** | -1.25*** |
| RIB-16300 x RIB-16324 | 1.23 | -1.84 | -0.31 | 1.03 | 5.32** | 3.18* | -19.42** | -24.21*** | -21.82*** | -0.39*** | -0.22** | -0.31*** | 1.41 | 1.50* | 1.45** | 0.53* | 0.13 | 0.33* | -0.74* | -0.43 | -0.59** |
| RIB-16300 x J-2340 | 1.13 | 0.66 | 0.90 | 0.82 | 0.39 | 0.60 | -1.23 | -3.88 | -2.56 | -0.64*** | -0.51*** | -0.58*** | 0.48 | 0.97 | 0.73 | -0.00 | 0.16 | 0.08 | 0.19 | -0.26 | -0.03 |
| RIB-16300 x 20K86 | 3.03* | 0.16 | 1.60 | 4.08 | 0.24 | 2.16 | 20.88*** | 13.61* | 17.25*** | 0.35** | -0.66*** | -0.16* | 1.00 | 0.68 | 0.84 | 0.53* | 0.42* | 0.47** | -0.06 | -0.39 | -0.22 |
| RIB-16300 x RIB-192 | -3.46** | -3.26** | -3.36*** | -4.65* | -3.98* | -4.32** | -4.65 | -7.91 | -6.28 | -0.57*** | -0.21** | -0.39*** | -1.29 | -0.32 | -0.81 | 0.40 | 0.50* | 0.45** | -0.25 | 0.31 | 0.03 |
| RIB-16324 x J-2340 | -3.91** | -3.01** | -3.46*** | -5.28* | -5.22** | -5.25*** | 20.26** | 19.90*** | 20.08*** | -0.11 | 0.05 | -0.03 | 2.88*** | 3.52*** | 3.20*** | 0.81*** | 0.50* | 0.65*** | 1.78*** | 0.23 | 1.01*** |
| RIB-16324 x 20K86 | 1.03 | 1.83 | 1.43 | 1.81 | 1.30 | 1.55 | 10.70 | 14.31* | 12.51** | 1.13*** | -0.23** | 0.45*** | 0.09 | -0.59 | -0.25 | 0.31 | 0.13 | 0.22 | -0.17 | 1.24*** | 0.53** |
| RIB-16324 x RIB-192 | 5.55*** | 2.74* | 4.15*** | 7.25*** | 11.41*** | 9.33*** | 22.03*** | 20.35*** | 21.19*** | 0.38*** | -0.23** | 0.08 | 1.00 | 2.30*** | 1.65*** | 0.40 | 0.12 | 0.26 | -1.63*** | -0.49 | -1.06*** |
| J-2340 x 20K86 | 3.94** | 3.33** | 3.63*** | 5.45* | 3.03 | 4.24** | 9.53 | 14.38* | 11.96** | 0.89*** | -0.01 | 0.44*** | 4.43*** | 5.20*** | 4.82*** | 1.26*** | 1.32*** | 1.29*** | 0.80** | -1.35*** | -0.28 |
| J-2340 x RIB-192 | 5.28*** | 3.58** | 4.43*** | 5.71** | 4.47* | 5.09*** | 15.20* | 11.54* | 13.37** | 0.80*** | 0.00 | 0.40*** | 1.98** | 2.58*** | 2.28*** | 0.30 | 0.38 | 0.34* | 1.40*** | 0.71** | 1.06*** |
| 20K86 x RIB-192 | -7.98*** | -5.59*** | -6.79*** | -10.36*** | -7.01*** | -8.69*** | -6.69 | 2.28 | -2.20 | -0.62*** | -0.15* | -0.38*** | -3.94*** | -4.65*** | -4.30*** | 0.69** | -0.14 | 0.28 | 1.39*** | 1.65*** | 1.52*** |

**, **, *** Significant at P<0.05, P<0.01, and P<0.001, respectively*

**Table S2.** *(Continued)*

| **Cross** | **DFY** | | | **GY** | | | **HI** | | | **Fe** | | | **Zn** | | | **Protein** | | |
| --- | --- | --- | --- | --- | --- | --- | --- | --- | --- | --- | --- | --- | --- | --- | --- | --- | --- | --- |
|  | **E1** | **E2** | **Pooled** | **E1** | **E2** | **Pooled** | **E1** | **E2** | **Pooled** | **E1** | **E2** | **Pooled** | **E1** | **E2** | **Pooled** | **E1** | **E2** | **Pooled** |
| RIB-9178 x RIB-9184 | -28.63*** | -25.25*** | -26.94*** | 2.90*** | 2.34*** | 2.62*** | 5.06*** | 4.17*** | 4.61*** | 1.24 | 1.55 | 1.40 | -1.22 | -0.02 | -0.62 | -0.00 | 0.02 | 0.01 |
| RIB-9178 x RIB-9185 | -26.13*** | -25.72*** | -25.92*** | -2.56** | -3.27*** | -2.91*** | 0.52 | -0.54 | -0.01 | 7.43*** | 5.63*** | 6.53*** | -0.11 | -1.44 | -0.78 | 0.23 | 0.10 | 0.16 |
| RIB-9178 x RIB-9205 | -6.25 | -8.66* | -7.45* | -2.16** | -2.19*** | -2.18*** | -2.92** | -2.99*** | -2.95*** | -9.08*** | -7.44*** | -8.26*** | -3.46** | -3.97** | -3.71*** | -0.47 | -0.47 | -0.47* |
| RIB-9178 x RIB-15131 | 65.89*** | 58.59*** | 62.24*** | 6.84*** | 6.00*** | 6.42*** | -3.48*** | -3.23*** | -3.36*** | -2.11 | -2.09 | -2.10* | -1.65 | -2.35 | -2.00* | 0.36 | 0.37 | 0.37 |
| RIB-9178 x RIB-16300 | 12.41** | -9.26* | 1.57 | 1.20 | 0.26 | 0.73 | -1.84 | 0.68 | -0.58 | 0.84 | 0.69 | 0.77 | 3.51** | 1.92 | 2.71** | -1.35*** | -1.38*** | -1.37*** |
| RIB-9178 x RIB-16324 | 32.13*** | 30.31*** | 31.22*** | 2.25** | 0.26 | 1.26* | -2.52** | -3.21*** | -2.87*** | 0.26 | -1.19 | -0.46 | 3.66** | 4.09** | 3.88*** | -0.29 | -0.37 | -0.33 |
| RIB-9178 x J-2340 | 38.68*** | 33.21*** | 35.94*** | 3.55*** | 4.82*** | 4.19*** | -3.88*** | -2.12** | -3.00*** | -2.94* | -1.69 | -2.31* | 3.75** | 7.38*** | 5.56*** | 0.96** | 1.14*** | 1.05*** |
| RIB-9178 x 20K86 | -10.49* | 9.62* | -0.44 | -3.94*** | -4.35*** | -4.14*** | -2.26* | -5.97*** | -4.12*** | -0.36 | -2.52* | -1.44 | -2.03 | 0.04 | -0.99 | -0.60 | -0.47 | -0.53* |
| RIB-9178 x RIB-192 | 47.73*** | 46.01*** | 46.87*** | 0.85 | 0.27 | 0.56 | -3.97*** | -4.35*** | -4.16*** | -3.02* | -2.92* | -2.97** | -1.04 | 0.74 | -0.15 | 0.04 | 0.30 | 0.17 |
| RIB-9184 x RIB-9185 | 22.62*** | 16.55*** | 19.59*** | 0.41 | 0.54 | 0.47 | -2.29* | -1.59* | -1.94** | 1.43 | -4.24*** | -1.41 | -1.61 | 1.52 | -0.04 | 0.17 | 0.45 | 0.31 |
| RIB-9184 x RIB-9205 | -22.63*** | 7.14 | -7.74* | 1.18 | 1.34* | 1.26* | 3.58*** | -0.66 | 1.46* | 3.00* | 1.80 | 2.40** | -0.26 | -2.40 | -1.33 | -0.01 | -0.02 | -0.01 |
| RIB-9184 x RIB-15131 | -2.09 | -32.88*** | -17.48*** | 5.74*** | 6.04*** | 5.89*** | 3.83*** | 11.21*** | 7.52*** | -0.53 | -0.47 | -0.50 | 4.15*** | 2.47* | 3.31*** | 1.56*** | 1.55*** | 1.55*** |
| RIB-9184 x RIB-16300 | -3.67 | -1.57 | -2.62 | -5.33*** | -3.57*** | -4.45*** | -4.05*** | -3.84*** | -3.94*** | -5.07*** | 0.52 | -2.28* | -0.47 | 0.60 | 0.06 | -0.50 | -0.55 | -0.52* |
| RIB-9184 x RIB-16324 | -24.67*** | -18.17*** | -21.42*** | -5.22*** | -5.96*** | -5.59*** | -1.54 | -2.95*** | -2.25*** | 0.54 | -0.92 | -0.19 | 2.68* | 0.80 | 1.74* | 0.90** | 0.80* | 0.85*** |
| RIB-9184 x J-2340 | 59.25*** | 54.25*** | 56.75*** | -2.73*** | -1.92** | -2.32*** | -6.94*** | -6.07*** | -6.51*** | 11.20*** | 9.06*** | 10.13*** | 4.39*** | 1.46 | 2.92*** | -1.83*** | -1.94*** | -1.89*** |
| RIB-9184 x 20K86 | 29.21*** | 21.89*** | 25.55*** | -3.54*** | -2.87*** | -3.21*** | -5.02*** | -4.46*** | -4.74*** | 2.67 | -0.65 | 1.01 | 4.28*** | 2.22 | 3.25*** | -0.49 | -0.66* | -0.57* |
| RIB-9184 x RIB-192 | 0.61 | 3.27 | 1.94 | 7.83*** | 6.32*** | 7.07*** | 4.81*** | 4.14*** | 4.47*** | 1.32 | 4.22*** | 2.77** | -1.00 | 0.45 | -0.27 | 1.23*** | 1.59*** | 1.41*** |
| RIB-9185 x RIB-9205 | 26.69*** | 16.83*** | 21.76*** | 5.86*** | 4.07*** | 4.96*** | -0.87 | 0.15 | -0.36 | -0.43 | -4.58*** | -2.51** | -2.84* | -0.25 | -1.54 | 1.16*** | 1.39*** | 1.28*** |
| RIB-9185 x RIB-15131 | -15.55** | -11.07** | -13.31*** | 9.02*** | -0.29 | 4.37*** | 13.33*** | 1.03 | 7.18*** | -5.22*** | 1.29 | -1.96* | -2.28 | -0.32 | -1.30 | -0.65* | -0.65* | -0.65** |
| RIB-9185 x RIB-16300 | 81.75*** | 69.17*** | 75.46*** | 3.77*** | 1.65** | 2.71*** | -6.39*** | -6.31*** | -6.35*** | -3.11* | -1.00 | -2.05* | 3.60** | -0.54 | 1.53 | -1.13*** | -1.20*** | -1.17*** |
| RIB-9185 x RIB-16324 | 14.20** | 11.76** | 12.98*** | -1.51 | 7.31*** | 2.90*** | -3.32*** | 4.86*** | 0.77 | -2.22 | -3.46** | -2.84** | 7.22*** | 5.15*** | 6.18*** | 0.14 | 0.03 | 0.08 |
| RIB-9185 x J-2340 | -44.90*** | -42.99*** | -43.94*** | 2.84*** | 0.76 | 1.80*** | 12.35*** | 10.56*** | 11.45*** | -0.24 | 1.18 | 0.47 | 1.86 | -0.14 | 0.86 | -0.58 | -0.77* | -0.67** |
| RIB-9185 x 20K86 | 2.67 | -4.06 | -0.70 | 0.30 | -0.96 | -0.33 | -0.46 | -0.26 | -0.36 | 4.96** | -0.27 | 2.35* | 2.01 | 0.32 | 1.16 | -0.34 | -0.55 | -0.45* |
| RIB-9185 x RIB-192 | 0.71 | 1.97 | 1.34 | -0.17 | 0.20 | 0.02 | -1.23 | -0.68 | -0.96 | 1.12 | 2.43* | 1.78 | -0.08 | 2.46* | 1.19 | 0.61 | 0.49 | 0.55* |
| RIB-9205 x RIB-15131 | -17.34*** | -15.50*** | -16.42*** | -0.63 | 1.34* | 0.36 | 2.62** | 4.55*** | 3.59*** | 0.95 | 2.47* | 1.71 | 4.86*** | 4.32*** | 4.59*** | -1.38*** | -1.26*** | -1.32*** |
| RIB-9205 x RIB-16300 | -3.07 | -4.99 | -4.03 | 0.60 | 0.72 | 0.66 | 1.15 | 1.76* | 1.45* | 5.25*** | 3.67** | 4.46*** | -1.65 | -0.63 | -1.14 | -0.35 | -0.29 | -0.32 |
| RIB-9205 x RIB-16324 | 33.86*** | 30.89*** | 32.38*** | 2.96*** | 1.42* | 2.19*** | -2.98** | -2.47** | -2.72*** | -1.34 | 1.31 | -0.01 | 5.22*** | 2.28 | 3.75*** | -0.87** | -0.83* | -0.85*** |
| RIB-9205 x J-2340 | 46.32*** | 35.46*** | 40.89*** | 0.27 | 0.28 | 0.27 | -7.36*** | -5.51*** | -6.43*** | 10.04*** | 11.35*** | 10.70*** | 0.69 | 1.81 | 1.25 | 1.74*** | 1.67*** | 1.71*** |
| RIB-9205 x 20K86 | -13.07** | -9.92* | -11.50*** | 0.65 | -0.34 | 0.16 | 4.61*** | 1.93* | 3.27*** | 16.58*** | 12.34*** | 14.46*** | 4.93*** | 1.79 | 3.36*** | -0.19 | -0.26 | -0.22 |
| RIB-9205 x RIB-192 | 4.93 | 1.70 | 3.31 | -1.53 | -2.17*** | -1.85*** | -3.48*** | -3.46*** | -3.47*** | -2.02 | -6.39*** | -4.20*** | 3.12** | 2.01 | 2.57** | 0.55 | 0.58 | 0.56* |
| RIB-15131 x RIB-16300 | 15.60** | 19.86*** | 17.73*** | 1.24 | 1.35* | 1.29** | -1.70 | -2.46** | -2.08*** | 0.50 | -3.42** | -1.46 | -1.47 | 0.16 | -0.66 | 0.15 | 0.24 | 0.19 |
| RIB-15131 x RIB-16324 | -38.71*** | -37.93*** | -38.32*** | 1.51 | -0.19 | 0.66 | 7.48*** | 8.52*** | 8.00*** | -7.36*** | -6.08*** | -6.72*** | -5.32*** | -3.06* | -4.19*** | 0.33 | 0.40 | 0.36 |
| RIB-15131 x J-2340 | 26.06*** | 24.61*** | 25.34*** | -3.49*** | -3.08*** | -3.28*** | -7.05*** | -7.12*** | -7.08*** | 3.39* | 2.99* | 3.19*** | 2.83* | -1.15 | 0.84 | -1.01** | -1.01** | -1.01*** |
| RIB-15131 x 20K86 | -9.03 | -5.59 | -7.31* | -3.86*** | -2.47*** | -3.17*** | -1.74 | -1.65* | -1.69** | 0.76 | 1.06 | 0.91 | 1.79 | 0.40 | 1.10 | 0.23 | 0.19 | 0.21 |
| RIB-15131 x RIB-192 | 14.32** | 20.09*** | 17.21*** | -4.38*** | -2.29*** | -3.33*** | -5.14*** | -4.80*** | -4.97*** | 8.94*** | 4.55*** | 6.75*** | -2.05 | -4.02** | -3.04*** | -1.61*** | -1.52*** | -1.57*** |
| RIB-16300 x RIB-16324 | -45.77*** | -37.54*** | -41.66*** | -5.63*** | -7.40*** | -6.52*** | 2.85** | -0.44 | 1.21* | 11.30*** | 6.78*** | 9.04*** | -1.69 | -0.88 | -1.29 | 0.94** | 0.92** | 0.93*** |
| RIB-16300 x J-2340 | -12.83** | -11.68** | -12.25*** | -0.96 | -0.14 | -0.55 | 0.44 | 1.31 | 0.88 | -2.51 | -1.07 | -1.79 | -1.49 | -1.13 | -1.31 | -0.13 | -0.23 | -0.18 |
| RIB-16300 x 20K86 | -2.03 | -2.82 | -2.43 | 11.99*** | 11.47*** | 11.73*** | 9.68*** | 11.00*** | 10.34*** | -0.29 | 7.32*** | 3.51*** | -0.78 | -3.18* | -1.98* | 0.26 | 0.55 | 0.41 |
| RIB-16300 x RIB-192 | -34.53*** | -24.65*** | -29.59*** | 5.73*** | 4.88*** | 5.30*** | 9.52*** | 8.41*** | 8.96*** | 13.88*** | 9.21*** | 11.54*** | 12.60*** | 10.28*** | 11.44*** | 1.16*** | 1.59*** | 1.38*** |
| RIB-16324 x J-2340 | -7.93 | -5.95 | -6.94* | 0.62 | -0.61 | 0.00 | 0.02 | -0.15 | -0.06 | -1.07 | -0.74 | -0.91 | -3.69** | 1.87 | -0.91 | 0.05 | 0.33 | 0.19 |
| RIB-16324 x 20K86 | 14.09** | 12.71** | 13.40*** | 13.30*** | 10.88*** | 12.09*** | 5.93*** | 6.14*** | 6.04*** | -7.09*** | -0.02 | -3.55*** | -0.38 | 4.07** | 1.84* | -0.82* | -0.60 | -0.71** |
| RIB-16324 x RIB-192 | 115.23*** | 87.66*** | 101.45*** | 7.73*** | 6.04*** | 6.89*** | -2.97** | -2.21** | -2.59*** | -0.95 | 0.31 | -0.32 | -1.34 | 0.06 | -0.64 | -1.22*** | -0.90** | -1.06*** |
| J-2340 x 20K86 | 23.83*** | 17.49*** | 20.66*** | 5.59*** | 5.47*** | 5.53*** | -0.44 | 1.08 | 0.32 | -2.66 | -3.40** | -3.03** | 2.99* | 1.56 | 2.27** | 1.33*** | 1.54*** | 1.44*** |
| J-2340 x RIB-192 | -45.20*** | -35.21*** | -40.20*** | 6.74*** | 5.38*** | 6.06*** | 11.64*** | 10.64*** | 11.14*** | -1.59 | -0.69 | -1.14 | -0.55 | -1.20 | -0.88 | -0.26 | -0.64* | -0.45* |
| 20K86 x RIB-192 | -9.46* | -3.54 | -6.50* | -7.53*** | -6.31*** | -6.92*** | -5.30*** | -5.57*** | -5.43*** | -10.65*** | -10.22*** | -10.44*** | -5.85*** | -5.75*** | -5.80*** | -0.17 | -0.57 | -0.37 |

*Positive SCA effects indicate superior hybrid performance beyond parental GCA contributions*

**Table S3.** Hayman's genetic component analysis for yield and biofortification traits in pearl millet

| **Component** | **DF** | | | **DM** | | | **PH** | | | **Tillers** | | | **PL** | | | **PG** | | | **TW** | | |
| --- | --- | --- | --- | --- | --- | --- | --- | --- | --- | --- | --- | --- | --- | --- | --- | --- | --- | --- | --- | --- | --- |
|  | **E1** | **E2** | **Pooled** | **E1** | **E2** | **Pooled** | **E1** | **E2** | **Pooled** | **E1** | **E2** | **Pooled** | **E1** | **E2** | **Pooled** | **E1** | **E2** | **Pooled** | **E1** | **E2** | **Pooled** |
| **D** | 23.06±13.26 | 6.55±7.88 | 12.82±9.24 | 28.00±21.83 | 7.07±19.73 | 11.11±18.58 | 679.44±290.92* | 710.20±296.73* | 710.14±294.70* | 0.13±0.26 | 0.10±0.12 | 0.08±0.16 | 25.85±2.82** | 25.91±4.13** | 24.81±3.34** | 0.67±0.29 | 0.58±0.27 | 0.54±0.25 | 2.04±0.80* | 1.17±0.57 | 1.42±0.43* |
| **H₁** | 70.19±11.93** | 46.40±7.09** | 52.03±8.31** | 100.73±19.65** | 84.98±17.76** | 83.68±16.72** | 1413.18±261.83** | 1830.73±267.06** | 1481.92±265.23** | 1.31±0.24** | 0.66±0.11** | 0.72±0.14** | 17.21±2.53** | 25.40±3.72** | 20.84±3.01** | 1.36±0.26** | 1.98±0.24** | 1.38±0.22** | 4.62±0.72** | 4.23±0.51** | 2.87±0.39** |
| **H₂** | 61.07±6.75** | 40.30±4.01** | 45.38±4.70** | 87.12±11.12** | 75.03±10.05** | 72.78±9.46** | 1149.59±148.11** | 1445.54±151.07** | 1147.53±150.04** | 1.08±0.13** | 0.52±0.06** | 0.57±0.08** | 15.42±1.43** | 20.08±2.10** | 17.73±1.70** | 1.03±0.15** | 1.34±0.14** | 0.99±0.12** | 3.53±0.41** | 3.21±0.29** | 2.09±0.22** |
| **F** | -10.96±7.95 | -5.64±4.73 | -9.53±5.54 | -23.07±13.10 | 0.29±11.84 | -13.13±11.15 | 593.89±174.55** | 910.12±178.04** | 785.90±176.82** | 0.06±0.16 | -0.01±0.07 | -0.00±0.09 | 4.98±1.69* | 11.77±2.48** | 6.95±2.01** | -0.20±0.18 | 0.68±0.16** | 0.11±0.15 | 2.16±0.48** | 1.51±0.34** | 1.50±0.26** |
| **h²** | 60.44±2.39** | 75.64±1.42** | 68.08±1.66** | 94.35±3.93** | 75.35±3.55** | 85.36±3.34** | 3026.09±52.37** | 2220.88±53.41** | 2615.40±53.05** | 0.26±0.05** | 0.08±0.02** | 0.15±0.03** | 35.96±0.51** | 43.77±0.74** | 39.90±0.60** | 0.56±0.05** | 0.34±0.05** | 0.45±0.04** | 3.19±0.14** | 2.44±0.10** | 2.79±0.08** |
| **E** | 2.93±6.63 | 2.07±3.94 | 1.83±4.62 | 8.11±10.92 | 6.38±9.87 | 5.06±9.29 | 68.02±145.46 | 59.70±148.36 | 43.21±147.35 | 0.02±0.13 | 0.01±0.06 | 0.02±0.08 | 0.98±1.41 | 0.81±2.07 | 0.53±1.67 | 0.09±0.15 | 0.08±0.13 | 0.06±0.12 | 0.16±0.40 | 0.12±0.28 | 0.15±0.22 |
| **√(H₁/D)** | 1.74 | 2.66 | 2.01 | 1.90 | 3.47 | 2.74 | 1.44 | 1.61 | 1.44 | 3.13 | 2.61 | 2.93 | 0.82 | 0.99 | 0.92 | 1.42 | 1.85 | 1.60 | 1.50 | 1.90 | 1.42 |
| **H₂/4H₁** | 0.218 | 0.217 | 0.218 | 0.216 | 0.221 | 0.217 | 0.203 | 0.197 | 0.194 | 0.206 | 0.199 | 0.199 | 0.224 | 0.198 | 0.213 | 0.190 | 0.169 | 0.179 | 0.191 | 0.189 | 0.182 |
| **KD/KR** | 0.76 | 0.72 | 0.69 | 0.64 | 1.01 | 0.65 | 1.87 | 2.33 | 2.24 | 1.17 | 0.94 | 0.98 | 1.27 | 1.60 | 1.36 | 0.81 | 1.93 | 1.14 | 2.08 | 2.02 | 2.18 |
| **h²(ns)** | 0.22 | 0.13 | 0.19 | 0.18 | 0.10 | 0.12 | 0.39 | 0.41 | 0.44 | 0.13 | 0.16 | 0.13 | 0.44 | 0.45 | 0.45 | 0.26 | 0.30 | 0.27 | 0.40 | 0.32 | 0.41 |
| **h²(bs)** | 0.95 | 0.93 | 0.95 | 0.91 | 0.89 | 0.91 | 0.95 | 0.96 | 0.97 | 0.97 | 0.98 | 0.95 | 0.97 | 0.98 | 0.99 | 0.94 | 0.95 | 0.95 | 0.96 | 0.97 | 0.95 |

**, ** Significant at P<0.05 and P<0.01, respectively*

*D = Additive variance; H₁, H₂ = Dominance components; F = Additive-dominance covariance; h² = Dominance effect; E = Environmental variance*

**Table S3.** *(Continued)*

| **Component** | **DFY** | | | **GY** | | | **HI** | | | **Fe** | | | **Zn** | | | **Protein** | | |
| --- | --- | --- | --- | --- | --- | --- | --- | --- | --- | --- | --- | --- | --- | --- | --- | --- | --- | --- |
|  | **E1** | **E2** | **Pooled** | **E1** | **E2** | **Pooled** | **E1** | **E2** | **Pooled** | **E1** | **E2** | **Pooled** | **E1** | **E2** | **Pooled** | **E1** | **E2** | **Pooled** |
| **D** | 466.28±1181.81 | 363.46±818.92 | 403.42±992.81 | 1.23±21.29 | 2.64±19.77 | 1.11±20.65 | 21.36±25.27 | 19.33±17.94 | 19.82±20.14 | 80.36±32.97* | 72.87±29.31* | 72.88±30.08* | 22.73±9.24* | 18.11±8.89 | 18.06±8.44 | 0.22±0.40 | 0.10±0.47 | 0.23±0.42 |
| **H₁** | 5579.55±1063.63** | 4168.71±737.03** | 4778.68±893.53** | 114.66±19.16** | 82.22±17.79** | 92.67±18.58** | 137.26±22.74** | 126.85±16.14** | 123.46±18.13** | 176.97±29.68** | 134.18±26.38** | 145.41±27.08** | 56.32±8.31** | 40.79±8.00** | 43.27±7.59** | 2.72±0.36** | 3.08±0.43** | 3.11±0.38** |
| **H₂** | 5116.27±601.68** | 3732.14±416.93** | 4334.84±505.46** | 107.10±10.84** | 78.16±10.07** | 87.32±10.51** | 114.95±12.86** | 103.37±9.13** | 101.30±10.26** | 136.70±16.79** | 96.25±14.92** | 107.56±15.32** | 52.30±4.70** | 34.72±4.52** | 39.60±4.30** | 2.59±0.20** | 2.94±0.24** | 2.91±0.21** |
| **F** | 313.10±709.09 | 421.06±491.35 | 362.04±595.69 | 1.42±12.77 | -2.31±11.86 | -1.38±12.39 | 30.46±15.16 | 32.87±10.76* | 30.73±12.09* | 39.10±19.78 | 57.11±17.58* | 45.05±18.05* | 0.11±5.54 | 12.81±5.33* | 3.63±5.06 | -0.11±0.24 | -0.12±0.28 | 0.01±0.25 |
| **h²** | 4483.27±212.73** | 3163.68±147.41** | 3798.21±178.71** | 164.15±3.83** | 81.15±3.56** | 119.06±3.72** | 2.74±4.55 | 2.07±3.23 | 2.45±3.63 | 60.47±5.94** | 32.53±5.28** | 45.67±5.42** | 61.28±1.66** | 41.99±1.60** | 51.49±1.52** | 0.16±0.07 | -0.03±0.09 | 0.08±0.08 |
| **E** | 39.74±590.90 | 29.34±409.46 | 24.88±496.40 | 1.11±10.64 | 0.71±9.89 | 0.81±10.32 | 1.61±12.63 | 0.99±8.97 | 1.12±10.07 | 3.94±16.49 | 2.34±14.65 | 2.41±15.04 | 2.43±4.62 | 2.71±4.44 | 1.75±4.22 | 0.19±0.20 | 0.18±0.24 | 0.10±0.21 |
| **√(H₁/D)** | 3.46 | 3.39 | 3.44 | 9.67 | 5.58 | 9.15 | 2.53 | 2.56 | 2.50 | 1.48 | 1.36 | 1.41 | 1.57 | 1.50 | 1.55 | 3.49 | 5.47 | 3.64 |
| **H₂/4H₁** | 0.229 | 0.224 | 0.227 | 0.234 | 0.238 | 0.236 | 0.209 | 0.204 | 0.205 | 0.193 | 0.179 | 0.185 | 0.232 | 0.213 | 0.229 | 0.238 | 0.239 | 0.234 |
| **KD/KR** | 1.21 | 1.41 | 1.30 | 1.13 | 0.85 | 0.87 | 1.78 | 1.99 | 1.90 | 1.39 | 1.81 | 1.56 | 1.00 | 1.62 | 1.14 | 0.86 | 0.81 | 1.01 |
| **h²(ns)** | 0.13 | 0.14 | 0.13 | 0.02 | 0.05 | 0.02 | 0.22 | 0.23 | 0.24 | 0.34 | 0.41 | 0.37 | 0.28 | 0.35 | 0.30 | 0.09 | 0.04 | 0.10 |
| **h²(bs)** | 0.99 | 0.99 | 0.99 | 0.98 | 0.98 | 0.98 | 0.98 | 0.99 | 0.99 | 0.98 | 0.98 | 0.98 | 0.95 | 0.93 | 0.96 | 0.89 | 0.90 | 0.95 |

*√(H₁/D) = Average degree of dominance; H₂/4H₁ = Gene distribution (0.25 = equal); KD/KR = Dominant to recessive allele ratio*

*h²(ns) = Narrow sense heritability; h²(bs) = Broad sense heritability; √(H₁/D) < 1 = Partial dominance, = 1 = Complete dominance, > 1 = Over-dominance*

**Table S4.** Regression coefficient of Wr on Vr with their standard error, deviation from zero, unity, t² value and model adequacy for different characters in F₁ generation

| **S. No.** | **Characters** | **Environments** | **b** | **SE (b)** | **(b-0)/SE(b)** | **(1-b)/SE(b)** | **t² value** | **Model Adequacy** |
| --- | --- | --- | --- | --- | --- | --- | --- | --- |
| **1** | Days to 50% flowering | E1 | 0.40 | 0.16 | 2.53* | 3.85** | 4.23* | Inadequate |
| E2 | 0.36 | 0.16 | 2.22 | 4.01** | 4.30* | Inadequate |
| Pooled | 0.44 | 0.15 | 2.89* | 3.73** | 26.48** | Inadequate |
| **2** | Days to maturity | E1 | 0.31 | 0.15 | 2.05 | 4.45** | 5.33* | Inadequate |
| E2 | 0.06 | 0.16 | 0.37 | 5.71*** | 5.64* | Inadequate |
| Pooled | 0.16 | 0.17 | 0.95 | 5.00** | 24.16** | Inadequate |
| **3** | Plant height (cm) | E1 | 0.28 | 0.21 | 1.35 | 3.42** | 1.83 | Inadequate |
| E2 | 0.20 | 0.29 | 0.70 | 2.76* | 0.26 | Inadequate |
| Pooled | 0.17 | 0.23 | 0.73 | 3.67** | 10.39* | Inadequate |
| **4** | Productive tillers per plant | E1 | 0.07 | 0.11 | 0.67 | 8.23** | 15.78** | Inadequate |
| E2 | 0.17 | 0.11 | 1.62 | 7.71** | 16.76** | Inadequate |
| Pooled | 0.09 | 0.09 | 0.94 | 9.64** | 23.67** | Inadequate |
| **5** | Panicle length (cm) | E1 | 1.39 | 0.27 | 5.16* | -1.44 | 7.91** | **Adequate** |
| E2 | 0.86 | 0.36 | 2.41* | 0.39 | 1.12 | **Adequate** |
| Pooled | 1.16 | 0.34 | 3.42** | -0.48 | 1.02 | **Adequate** |
| **6** | Panicle girth (cm) | E1 | 0.23 | 0.17 | 1.37 | 4.50** | 4.38* | Inadequate |
| E2 | 0.95 | 0.48 | 2.01 | 0.09 | 3.28 | Inadequate |
| Pooled | 0.46 | 0.24 | 1.90 | 2.22 | 18.69** | Inadequate |
| **7** | Test weight (g) | E1 | 0.30 | 0.35 | 0.86 | 1.97 | 0.01 | Inadequate |
| E2 | 0.26 | 0.23 | 1.10 | 3.15* | 1.09 | Inadequate |
| Pooled | 0.43 | 0.21 | 2.03 | 2.72* | 20.11** | Inadequate |
| **8** | Dry fodder yield per plant (g) | E1 | -0.06 | 0.07 | -0.84 | 14.86** | 44.94** | Inadequate |
| E2 | -0.16 | 0.12 | -1.35 | 9.57** | 12.35** | Inadequate |
| Pooled | -0.10 | 0.08 | -1.25 | 13.49** | 24.78** | Inadequate |
| **9** | Grain yield per plant (g) | E1 | 0.02 | 0.04 | 0.53 | 25.40** | 163.96** | Inadequate |
| E2 | 0.07 | 0.06 | 1.20 | 16.06** | 69.83** | Inadequate |
| Pooled | 0.05 | 0.05 | 0.89 | 18.81** | 25.38** | Inadequate |
| **10** | Harvest index (%) | E1 | -0.10 | 0.16 | -0.64 | 6.83** | 5.82* | Inadequate |
| E2 | -0.40 | 0.19 | -2.14 | 7.50** | 2.27 | Inadequate |
| Pooled | -0.29 | 0.16 | -1.78 | 8.02** | 34.39** | Inadequate |
| **11** | Fe content (ppm) | E1 | 0.44 | 0.15 | 3.02* | 3.78** | 4.58* | Inadequate |
| E2 | 0.42 | 0.20 | 2.06 | 2.90* | 1.55 | Inadequate |
| Pooled | 0.42 | 0.16 | 2.59* | 3.56** | 8.16* | Inadequate |
| **12** | Zn content (ppm) | E1 | 0.65 | 0.16 | 4.17** | 2.20 | 1.42 | **Adequate** |
| E2 | 0.47 | 0.25 | 1.90 | 2.15 | 0.35 | Inadequate |
| Pooled | 0.61 | 0.20 | 3.09* | 2.01 | 14.11** | **Adequate** |
| **13** | Protein content (%) | E1 | 0.51 | 0.23 | 2.19 | 2.12 | 0.46 | Inadequate |
| E2 | 0.19 | 0.25 | 0.79 | 3.28** | 0.95 | Inadequate |
| Pooled | 0.38 | 0.24 | 1.55 | 2.57* | 65.55** | Inadequate |

**, **, *** Significant at P<0.05, P<0.01 and P<0.001, respectively*

*b = Regression coefficient of Wr on Vr; SE(b) = Standard error of regression coefficient*

*(b-0)/SE(b) = t-test for b differs from zero; (1-b)/SE(b) = t-test for b differs from unity; t² = Test for uniformity of Wr-Vr*

**Model Adequacy: Adequate = b significantly differs from 0 (P<0.05) but does not significantly differ from 1 (P>0.05)**

**Table S5a.** Mid-parent heterosis (MPH% %) for all 45 F₁ crosses in pearl millet

| **Cross** | **DF** | | | **DM** | | | **PH** | | | **Tillers** | | | **PL** | | | **PG** | | | **TW** | | |
| --- | --- | --- | --- | --- | --- | --- | --- | --- | --- | --- | --- | --- | --- | --- | --- | --- | --- | --- | --- | --- | --- |
|  | **E1** | **E2** | **Pooled** | **E1** | **E2** | **Pooled** | **E1** | **E2** | **Pooled** | **E1** | **E2** | **Pooled** | **E1** | **E2** | **Pooled** | **E1** | **E2** | **Pooled** | **E1** | **E2** | **Pooled** |
| RIB-9178 x RIB-9184 | 4.79 | 1.64 | 3.24 | 2.11 | 2.07 | 2.09 | 6.87 | 5.13 | 6.01 | -20.00 | -30.08* | -25.23 | 7.00 | 18.44* | 12.30* | -4.62 | 13.25 | 3.69 | 17.57 | -3.37 | 8.14 |
| RIB-9178 x RIB-9185 | 2.21 | 1.35 | 1.79 | 0.27 | 7.52 | 3.73 | 4.70 | 13.79 | 9.20 | -13.03 | -28.70* | -21.56 | -9.76 | -4.05 | -7.05 | -2.61 | -4.72 | -3.63 | -8.72 | 22.27* | 5.88 |
| RIB-9178 x RIB-9205 | -8.42 | -12.84* | -10.62* | -6.99 | -13.08* | -10.07* | 17.15 | 14.76 | 15.97* | -12.04 | -7.04 | -9.50 | 25.96* | 49.67** | 36.52*** | -0.78 | 25.87* | 11.66* | 45.21* | 43.56** | 44.40*** |
| RIB-9178 x RIB-15131 | -7.51 | -6.58 | -7.07 | -6.28 | -2.88 | -4.66 | 19.19* | 16.36 | 17.79** | 87.33** | 32.76* | 60.42** | 15.80 | 33.28* | 23.75** | 14.89* | 1.27 | 8.55 | 15.01 | 30.14* | 22.22* |
| RIB-9178 x RIB-16300 | -6.00 | -12.34* | -9.21* | -4.52 | -8.79 | -6.65 | 24.95* | 9.81 | 17.41** | 24.88 | 25.43* | 25.15 | 2.95 | 14.36 | 8.17 | 11.64 | 32.34** | 21.23** | 18.66 | 16.81 | 17.72* |
| RIB-9178 x RIB-16324 | -0.61 | -1.58 | -1.08 | 0.40 | 0.30 | 0.35 | 58.66** | 58.20** | 58.43*** | 10.84 | 8.60 | 9.76 | 10.10 | 30.13* | 18.92** | 9.60 | 35.48** | 21.41** | 24.80 | 35.68* | 30.01** |
| RIB-9178 x J-2340 | -12.73* | -12.66* | -12.69** | -10.18 | -7.56 | -8.91* | 25.52* | 25.92* | 25.72*** | 6.63 | 13.57 | 10.15 | 23.45* | 45.09** | 33.03*** | 6.70 | 9.12 | 7.82 | 47.08** | 31.01* | 39.25** |
| RIB-9178 x 20K86 | -11.59 | -12.74* | -12.15** | -9.42 | -7.49 | -8.49 | 32.78* | 33.92* | 33.34*** | 10.53 | 2.85 | 6.67 | 4.56 | 10.37 | 7.32 | -8.34 | -0.43 | -4.64 | 21.57 | 29.88* | 25.60* |
| RIB-9178 x RIB-192 | -7.55 | -8.44 | -7.99 | -6.17 | -4.25 | -5.24 | 26.57* | 23.58* | 25.09*** | 16.98 | 38.25* | 26.56 | 8.68 | 25.94* | 16.38** | 12.77 | 20.76* | 16.53** | 59.80** | 24.08* | 42.44*** |
| RIB-9184 x RIB-9185 | -21.60** | -14.85* | -18.34*** | -19.04* | -11.34 | -15.37** | 1.14 | -1.08 | 0.03 | -4.24 | -12.82 | -8.91 | 9.98 | -0.59 | 4.68 | -3.64 | -18.90* | -11.46* | -12.57 | 13.30 | -0.79 |
| RIB-9184 x RIB-9205 | -23.03** | -18.81* | -20.92*** | -19.92* | -18.80* | -19.35*** | 19.71 | 9.23 | 14.46* | 14.68 | 1.75 | 8.05 | 20.79* | 26.90* | 23.75*** | -2.88 | -1.03 | -1.97 | 32.72* | 25.79* | 29.50** |
| RIB-9184 x RIB-15131 | -12.18* | -9.81 | -11.04** | -9.98 | -5.50 | -7.84 | 11.82 | 2.65 | 7.25 | -4.95 | -6.58 | -5.77 | 12.53 | 9.43 | 11.00* | 6.02 | 3.90 | 4.98 | 0.99 | 37.41** | 17.68* |
| RIB-9184 x RIB-16300 | -19.87* | -5.40 | -12.54** | -16.81* | -15.56* | -16.19** | 9.85 | -4.63 | 2.58 | 2.91 | 3.81 | 3.36 | 22.80* | 21.96* | 22.39*** | -1.81 | -3.07 | -2.43 | 13.47 | -1.56 | 6.19 |
| RIB-9184 x RIB-16324 | -31.16** | -24.07** | -27.69*** | -26.42** | -18.63* | -22.64*** | 23.60* | 23.88* | 23.74** | 5.18 | 12.99 | 9.05 | 20.10* | 29.47* | 24.60*** | -4.78 | 15.17 | 4.86 | 31.10* | 32.29* | 31.64** |
| RIB-9184 x J-2340 | -3.86 | -22.60** | -13.03** | -3.91 | -3.59 | -3.75 | -1.60 | 17.49 | 7.83 | 7.76 | 19.30 | 13.71 | -3.53 | -0.15 | -1.91 | -15.77 | -11.60 | -13.75* | -6.73 | 40.30** | 15.13 |
| RIB-9184 x 20K86 | -14.63* | -14.02* | -14.33** | -13.33 | -7.95 | -10.74* | 37.46** | 35.85** | 36.67*** | -9.05 | 0.57 | -4.15 | 3.66 | -0.69 | 1.46 | -9.15 | -13.53 | -11.30* | 3.33 | -9.16 | -2.47 |
| RIB-9184 x RIB-192 | -7.08 | -10.48 | -8.75* | -6.64 | -12.84 | -9.66* | 19.34* | 13.72 | 16.52** | 3.17 | 13.64 | 8.05 | 21.93* | 22.49* | 22.19*** | 0.01 | 9.88 | 4.91 | 10.74 | 5.99 | 8.52 |
| RIB-9185 x RIB-9205 | -16.23* | -12.24* | -14.29** | -14.11 | -2.25 | -8.20 | 9.17 | 13.87 | 11.52 | 71.10** | 27.68* | 47.94** | 11.59 | 7.34 | 9.48 | -0.63 | -5.95 | -3.36 | 15.04 | 18.01 | 16.48* |
| RIB-9185 x RIB-15131 | -8.68 | 2.21 | -3.56 | -7.49 | -8.15 | -7.80 | 12.47 | 15.33 | 13.89* | -18.26 | -25.46* | -22.01 | 21.99* | 15.65 | 18.79** | 17.56* | 5.97 | 11.66* | 0.00 | 2.28 | 1.09 |
| RIB-9185 x RIB-16300 | -2.89 | -8.50 | -5.67 | -3.13 | -4.67 | -3.89 | 12.04 | 7.51 | 9.77 | 1.84 | 9.32 | 5.75 | 9.32 | 2.69 | 5.99 | 10.53 | -1.37 | 4.47 | 16.04 | -6.74 | 4.62 |
| RIB-9185 x RIB-16324 | -10.26 | -8.57 | -9.45* | -7.78 | -5.01 | -6.46 | 27.07* | 9.87 | 18.51** | 12.08 | 26.04* | 19.30 | 14.05 | 13.29 | 13.68* | 10.27 | 12.52 | 11.41 | 20.35 | 24.71* | 22.43* |
| RIB-9185 x J-2340 | -14.96* | -10.19 | -12.67** | -12.23 | -6.06 | -9.28* | 6.13 | -8.99 | -1.34 | 44.23* | -17.76 | 10.71 | 5.81 | 6.90 | 6.34 | -6.45 | -13.92 | -10.23* | 7.62 | 39.36** | 23.04* |
| RIB-9185 x 20K86 | -9.73 | -8.33 | -9.06* | -7.60 | -2.51 | -5.18 | 7.53 | -12.49 | -2.31 | 19.10 | -2.62 | 7.54 | 18.24* | 9.66 | 13.81** | -2.00 | -11.67 | -6.93 | -12.73 | 7.50 | -2.94 |
| RIB-9185 x RIB-192 | -8.81 | -5.88 | -7.40 | -4.40 | -1.86 | -3.18 | 8.58 | 8.71 | 8.64 | 1.17 | 2.91 | 2.02 | 13.04 | 14.81* | 13.90** | -5.98 | -16.45* | -11.40* | 1.63 | -11.75 | -4.86 |
| RIB-9205 x RIB-15131 | -15.73* | -14.83* | -15.29** | -12.03 | -14.29* | -13.16** | 22.00 | 19.82 | 20.91** | -18.70 | -0.09 | -9.55 | 33.12* | 40.55* | 36.70*** | 13.28 | 0.46 | 6.99 | 9.69 | 23.03* | 16.27 |
| RIB-9205 x RIB-16300 | -7.22 | -15.69* | -11.56* | -5.75 | -10.74 | -8.34 | 8.84 | 37.15** | 23.11** | 42.76* | 50.64** | 46.64** | 19.42 | 17.22 | 18.36* | -1.44 | -1.28 | -1.36 | 31.56* | -2.70 | 13.62 |
| RIB-9205 x RIB-16324 | -11.53 | -12.38* | -11.95** | -8.42 | -17.39* | -12.96** | 45.68* | 58.71** | 52.18*** | 107.85*** | 84.66*** | 96.60*** | 32.53* | 41.44* | 36.68*** | 14.52 | 13.67 | 14.11* | 48.50* | 39.79* | 44.17** |
| RIB-9205 x J-2340 | -13.40* | -16.56* | -14.96** | -9.84 | -16.36* | -13.13** | 37.10* | 33.90* | 35.52*** | 71.18** | 58.07** | 64.59*** | 29.52* | 34.35* | 31.76*** | 12.47 | 6.00 | 9.32 | 33.33* | 45.32** | 39.42** |
| RIB-9205 x 20K86 | -13.48* | -15.38* | -14.42** | -11.11 | -2.98 | -7.03 | 43.32** | 43.17** | 43.25*** | 54.79* | 67.63** | 61.19*** | 23.35 | 14.97 | 19.14** | -1.24 | -3.15 | -2.18 | 11.72 | 2.10 | 6.88 |
| RIB-9205 x RIB-192 | -2.27 | -7.84 | -5.04 | -1.90 | -3.60 | -2.77 | 18.62 | 8.26 | 13.41 | 45.11* | 62.41** | 53.00*** | 29.13* | 39.95** | 34.15*** | -3.72 | -9.56 | -6.63 | 19.89 | 4.56 | 12.16 |
| RIB-15131 x RIB-16300 | -8.24 | -11.25* | -9.72* | -7.24 | -6.63 | -6.94 | 5.94 | 4.02 | 4.98 | -20.83 | 5.11 | -8.31 | 9.14 | 5.24 | 7.23 | 2.73 | -0.40 | 1.21 | 2.47 | -12.81 | -5.31 |
| RIB-15131 x RIB-16324 | -11.35* | -9.47 | -10.45* | -8.06 | -10.92 | -9.43* | 5.40 | 12.52 | 8.93 | -28.72 | -7.30 | -18.56 | 22.98 | 24.07 | 23.50** | 16.75 | 19.55* | 18.10** | 9.95 | 15.77 | 12.78 |
| RIB-15131 x J-2340 | -2.70 | -9.20 | -5.80 | -2.38 | -1.12 | -1.77 | 3.72 | -10.25 | -3.15 | -16.93 | -13.19 | -15.10 | 30.32* | 25.65* | 28.11*** | 14.34 | -1.48 | 6.69 | 1.04 | 8.19 | 4.57 |
| RIB-15131 x 20K86 | -1.63 | -3.88 | -2.70 | -0.55 | -0.94 | -0.73 | 12.44 | 14.81 | 13.60* | 4.30 | 28.25* | 15.96 | 15.80 | -0.64 | 7.40 | 6.87 | 10.10 | 8.45 | -22.76 | -3.86 | -13.49 |
| RIB-15131 x RIB-192 | 9.50 | 11.25* | 10.33* | 7.52 | -7.66 | 0.23 | 9.27 | 10.44 | 9.85 | -13.90 | 19.85 | 1.18 | 21.71* | 25.33* | 23.42*** | -1.87 | -7.02 | -4.42 | -6.98 | -24.80* | -15.74 |
| RIB-16300 x RIB-16324 | -3.70 | -11.93* | -7.83 | -3.46 | 1.31 | -1.08 | 7.02 | 1.37 | 4.19 | -8.61 | -5.20 | -6.98 | 24.54* | 30.65* | 27.46*** | 22.17* | 20.47* | 21.36** | 5.43 | -1.26 | 1.98 |
| RIB-16300 x J-2340 | -1.23 | -7.98 | -4.61 | -2.03 | -4.20 | -3.12 | 9.49 | 4.50 | 7.01 | -28.41 | -32.77* | -30.55* | 18.17 | 25.10* | 21.46** | 9.29 | 9.46 | 9.37 | 22.37 | 0.93 | 11.13 |
| RIB-16300 x 20K86 | 0.62 | -8.02 | -3.72 | 0.82 | -3.66 | -1.40 | 29.25* | 21.55* | 25.44*** | 31.03 | -35.87** | -1.63 | 14.96 | 8.32 | 11.59* | 13.91 | 10.95 | 12.46* | 4.76 | -10.44 | -3.12 |
| RIB-16300 x RIB-192 | -7.69 | -11.32* | -9.52* | -6.92 | -8.88 | -7.90 | 8.16 | 2.84 | 5.48 | -24.72 | -3.89 | -15.37 | 5.44 | 13.40 | 9.20 | 14.01 | 13.74 | 13.88* | 9.88 | -2.72 | 3.33 |
| RIB-16324 x J-2340 | -11.94* | -14.03* | -12.95** | -10.06 | -10.16 | -10.11* | 37.06* | 36.45** | 36.76*** | 28.30 | 14.29 | 21.57 | 38.38** | 56.07** | 46.51*** | 25.34* | 22.62* | 24.04** | 60.37** | 32.74* | 46.59*** |
| RIB-16324 x 20K86 | -5.11 | -4.50 | -4.82 | -3.06 | -1.55 | -2.33 | 39.35* | 41.91** | 40.60*** | 99.42** | -3.33 | 50.17** | 16.91 | 11.43 | 14.18* | 15.12 | 13.93 | 14.54* | 8.75 | 33.53* | 21.01* |
| RIB-16324 x RIB-192 | 6.43 | 0.31 | 3.44 | 6.25 | 10.94 | 8.54* | 38.26** | 35.63** | 36.95*** | 35.75* | 4.06 | 21.88 | 20.48* | 37.50** | 28.31*** | 18.97 | 15.83 | 17.44* | -5.91 | 3.50 | -1.25 |
| J-2340 x 20K86 | 2.27 | -2.41 | 0.00 | 2.66 | 1.10 | 1.91 | 26.22* | 27.80* | 26.99*** | 105.58** | 2.58 | 54.36** | 37.94** | 41.37** | 39.63*** | 22.83* | 20.45* | 21.67*** | 26.87 | -9.07 | 8.77 |
| J-2340 x RIB-192 | 8.48 | 1.23 | 4.94 | 6.04 | 2.95 | 4.53 | 22.89* | 18.44 | 20.69** | 64.50** | 11.77 | 41.03* | 23.37* | 35.69** | 29.04*** | 12.19 | 8.83 | 10.54 | 46.63* | 23.07 | 34.73** |
| 20K86 x RIB-192 | -16.47* | -14.81* | -15.66** | -13.89* | -10.54 | -12.27** | 16.82 | 19.79* | 18.28** | -11.60 | 2.69 | -5.19 | -5.79 | -9.85 | -7.77 | 15.00 | -0.70 | 7.21 | 28.89* | 23.83* | 26.36** |

**, **, *** Significant at P<0.05, P<0.01, and P<0.001, respectively; MPH = [(F₁ - MP)/MP] × 100*

**Table S5a.** *(Continued)*

| **Cross** | **DFY** | | | **GY** | | | **HI** | | | **Fe** | | | **Zn** | | | **Protein** | | |
| --- | --- | --- | --- | --- | --- | --- | --- | --- | --- | --- | --- | --- | --- | --- | --- | --- | --- | --- |
|  | **E1** | **E2** | **Pooled** | **E1** | **E2** | **Pooled** | **E1** | **E2** | **Pooled** | **E1** | **E2** | **Pooled** | **E1** | **E2** | **Pooled** | **E1** | **E2** | **Pooled** |
| RIB-9178 x RIB-9184 | 13.98 | 12.78 | 13.42 | 44.42* | 42.66* | 43.66* | 3.50 | -1.54 | 1.09 | 7.52 | 4.23 | 5.90 | 5.26 | 10.93 | 7.88 | -0.30 | 1.42 | 0.54 |
| RIB-9178 x RIB-9185 | 39.49 | 17.40 | 28.16 | 38.38 | 2.52 | 20.57 | -2.26 | -17.76 | -10.04 | 14.37 | 5.28 | 9.80 | 6.28 | 6.38 | 6.33 | -1.61 | -2.90 | -2.25 |
| RIB-9178 x RIB-9205 | 106.36* | 99.29* | 102.99** | 18.40 | -0.48 | 9.89 | -36.42* | -44.06** | -40.07*** | -11.35 | -14.64* | -12.93* | -1.36 | -3.86 | -2.51 | -7.36 | -5.86 | -6.63 |
| RIB-9178 x RIB-15131 | 201.67*** | 195.23*** | 198.66*** | 106.21** | 93.60** | 100.56*** | -29.01 | -34.48* | -31.71** | -8.85 | -10.56 | -9.66 | -3.29 | -5.37 | -4.29 | -4.13 | -2.49 | -3.33 |
| RIB-9178 x RIB-16300 | 78.73** | 32.83 | 57.03** | 54.63* | 36.19* | 46.30* | -17.54 | -6.66 | -12.24 | 10.98 | 11.30 | 11.13 | 23.84* | 19.37 | 21.69** | -18.68* | -17.42 | -18.07** |
| RIB-9178 x RIB-16324 | 153.27*** | 153.38*** | 153.32*** | 78.01** | 39.71* | 59.05** | -31.83* | -34.37* | -33.05** | -8.19 | -11.77 | -9.88 | 17.76 | 38.20* | 26.65** | -8.17 | -6.69 | -7.45 |
| RIB-9178 x J-2340 | 211.13*** | 199.62*** | 205.66*** | 76.62** | 97.39** | 85.59*** | -37.40* | -30.99* | -34.39** | -3.94 | 0.21 | -2.01 | 22.99* | 45.76** | 33.50*** | 7.84 | 10.48 | 9.15 |
| RIB-9178 x 20K86 | 52.09* | 102.77** | 75.39*** | 12.59 | -6.82 | 3.86 | -24.46 | -51.18** | -37.62*** | -2.95 | -9.96 | -6.32 | 0.21 | 7.12 | 3.50 | -11.31 | -9.29 | -10.31* |
| RIB-9178 x RIB-192 | 165.95*** | 210.59*** | 185.07*** | 67.31* | 54.44* | 61.65** | -41.74* | -50.81** | -46.25*** | -9.32 | -14.95 | -12.18 | 0.91 | 14.38 | 7.12 | -1.67 | 3.71 | 0.96 |
| RIB-9184 x RIB-9185 | 52.49** | 35.88* | 44.22*** | 45.24* | 36.29* | 41.09* | -0.21 | 1.99 | 0.83 | 14.97 | -5.17 | 4.66 | 8.64 | 15.65 | 11.95 | 3.19 | 5.89 | 4.52 |
| RIB-9184 x RIB-9205 | -3.97 | 42.29* | 18.01 | 30.43 | 39.93 | 34.34 | 9.53 | -17.95 | -2.80 | 28.90* | 19.36* | 24.24** | 14.82 | 1.95 | 8.63 | 2.84 | 4.42 | 3.61 |
| RIB-9184 x RIB-15131 | 17.37 | -27.74 | -3.83 | 75.29** | 97.16** | 84.32*** | 43.94 | 123.83*** | 80.97*** | 7.21 | 5.58 | 6.42 | 21.08* | 10.02 | 15.57* | 12.07 | 13.90 | 12.97** |
| RIB-9184 x RIB-16300 | 6.26 | 4.65 | 5.50 | -14.79 | -7.76 | -11.84 | -18.60 | -12.90 | -16.02 | 11.72 | 26.73* | 19.06* | 17.84 | 13.60 | 15.72* | -4.65 | -3.21 | -3.95 |
| RIB-9184 x RIB-16324 | 6.53 | 8.14 | 7.29 | -7.86 | -24.90 | -15.72 | -12.75 | -10.72 | -11.86 | 5.98 | 2.03 | 4.09 | 21.67* | 22.66 | 22.12** | 9.26 | 10.98 | 10.10* |
| RIB-9184 x J-2340 | 113.00*** | 111.18*** | 112.14*** | 5.65 | 17.16 | 10.21 | -52.07* | -47.37* | -50.05** | 53.72** | 50.99** | 52.42*** | 32.34** | 20.72 | 26.74** | -15.14 | -16.37 | -15.74** |
| RIB-9184 x 20K86 | 49.69* | 49.10* | 49.41*** | 0.05 | 3.51 | 1.50 | -32.69 | -33.43 | -33.03* | 18.14 | 7.38 | 12.87* | 27.41* | 14.02 | 20.80** | -4.34 | -5.64 | -4.98 |
| RIB-9184 x RIB-192 | 32.91* | 43.79* | 37.76** | 109.74** | 137.08** | 120.67*** | 51.09 | 53.34* | 52.14** | 22.12 | 20.55* | 21.31* | 8.94 | 12.48 | 10.65 | 15.77 | 22.42* | 19.01** |
| RIB-9185 x RIB-9205 | 110.96** | 71.18** | 90.21*** | 128.91** | 84.79** | 107.27*** | 3.74 | 1.82 | 2.82 | 13.77 | -3.75 | 5.01 | 5.21 | 8.85 | 6.93 | 11.84 | 14.67 | 13.24* |
| RIB-9185 x RIB-15131 | 14.57 | 3.06 | 8.77 | 155.49*** | 38.40* | 98.88*** | 146.76*** | 35.08* | 91.08*** | -9.59 | 1.37 | -4.21 | -0.36 | 1.52 | 0.57 | -12.50 | -12.69 | -12.60* |
| RIB-9185 x RIB-16300 | 137.77*** | 103.73*** | 120.56*** | 101.00** | 60.64** | 81.42*** | -8.34 | -16.07 | -12.13 | 8.35 | 10.74 | 9.55 | 29.75* | 10.05 | 20.08* | -15.00 | -15.29 | -15.14** |
| RIB-9185 x RIB-16324 | 74.98** | 53.85** | 64.36*** | 68.93* | 112.04*** | 91.74*** | 2.72 | 79.69** | 39.50* | -7.53 | -12.42 | -9.94 | 34.16** | 40.99* | 37.21*** | -1.87 | -2.25 | -2.06 |
| RIB-9185 x J-2340 | -15.02 | -29.02 | -22.23 | 96.18** | 62.87** | 80.61*** | 95.12** | 95.99*** | 95.52*** | 11.41 | 13.50 | 12.43 | 22.04* | 15.73 | 19.05* | -6.65 | -9.79 | -8.23 |
| RIB-9185 x 20K86 | 37.12 | 19.64 | 28.39* | 69.93** | 38.95* | 54.98** | 26.36 | 15.19 | 20.82 | 15.88 | -0.26 | 7.79 | 18.35 | 8.07 | 13.36 | -6.85 | -9.98 | -8.42 |
| RIB-9185 x RIB-192 | 52.50* | 50.64* | 51.62*** | 85.66** | 66.01* | 76.24** | 24.92 | 15.23 | 20.03 | 11.50 | 4.80 | 7.94 | 9.65 | 20.66 | 14.85 | 6.36 | 5.93 | 6.14 |
| RIB-9205 x RIB-15131 | 9.68 | 6.19 | 8.02 | 41.96 | 53.66* | 47.02* | 18.81 | 28.70* | 23.45* | 13.51 | 14.47* | 13.96* | 24.22* | 14.63 | 19.42** | -18.15* | -16.06 | -17.13** |
| RIB-9205 x RIB-16300 | 20.55 | 14.62 | 17.71 | 52.28* | 50.03* | 51.30* | 12.19 | 17.19 | 14.50 | 42.63** | 37.76** | 40.32*** | 14.47 | 8.10 | 11.27 | -5.50 | -2.64 | -4.11 |
| RIB-9205 x RIB-16324 | 130.32** | 130.51** | 130.41*** | 92.75** | 60.77* | 77.13** | -21.77 | -15.34 | -18.86 | 5.34 | 9.89 | 7.47 | 30.99* | 27.78* | 29.53** | -10.97 | -8.35 | -9.69 |
| RIB-9205 x J-2340 | 200.06** | 176.68** | 188.74*** | 50.93* | 57.63* | 53.70* | -44.11** | -39.66* | -42.13*** | 50.92** | 59.23*** | 54.77*** | 21.16* | 21.26 | 21.21* | 19.76* | 19.87* | 19.82** |
| RIB-9205 x 20K86 | 11.66 | 28.53 | 19.53 | 52.76* | 40.86 | 47.57* | 23.56 | 4.86 | 14.77 | 51.70** | 40.84** | 46.50*** | 30.95* | 11.51 | 21.33** | -3.62 | -3.69 | -3.65 |
| RIB-9205 x RIB-192 | 69.79* | 87.75** | 77.57*** | 46.41 | 31.75 | 40.25 | -25.30 | -33.56* | -29.18* | 15.70 | -7.42 | 4.05 | 23.80* | 17.13 | 20.58* | 7.25 | 10.55 | 8.86 |
| RIB-15131 x RIB-16300 | 37.66* | 36.98* | 37.34** | 62.54** | 57.38* | 60.28** | 20.45 | 12.85 | 16.81 | 14.11 | 6.84 | 10.73 | 6.58 | 3.12 | 4.77 | -5.61 | -2.70 | -4.19 |
| RIB-15131 x RIB-16324 | -8.17 | -23.14 | -15.17 | 79.99** | 44.06* | 62.69** | 81.85** | 109.99** | 94.98*** | -20.54* | -17.74* | -19.25** | -11.84 | -1.34 | -6.82 | -3.82 | -0.87 | -2.38 |
| RIB-15131 x J-2340 | 98.40** | 90.52** | 94.67*** | 23.05 | 15.67 | 19.99 | -32.54 | -36.31* | -34.25** | 17.05 | 22.79* | 19.65* | 20.80 | 2.03 | 11.32 | -14.38 | -14.27 | -14.33** |
| RIB-15131 x 20K86 | 10.75 | 14.62 | 12.53 | 19.81 | 19.12 | 19.51 | 10.57 | 3.07 | 6.92 | 3.39 | 4.99 | 4.14 | 12.84 | -0.40 | 6.02 | -4.66 | -4.47 | -4.57 |
| RIB-15131 x RIB-192 | 62.41** | 83.47** | 71.61*** | 24.38 | 32.86 | 27.94 | -18.97 | -25.32 | -22.09 | 29.18* | 13.58 | 21.49** | -3.23 | -13.11 | -8.21 | -20.36* | -18.05 | -19.23*** |
| RIB-16300 x RIB-16324 | -27.22 | -29.40 | -28.25* | 13.42 | -20.40 | -2.93 | 46.50* | 37.82* | 42.53** | 40.23** | 36.77** | 38.63*** | 11.44 | 18.81 | 14.94 | 4.90 | 8.16 | 6.49 |
| RIB-16300 x J-2340 | 15.91 | 8.27 | 12.26 | 44.02* | 56.00* | 49.06* | 15.22 | 33.21* | 23.27* | 21.32 | 37.32* | 28.57** | 17.94 | 12.95 | 15.41 | -3.10 | -2.98 | -3.04 |
| RIB-16300 x 20K86 | 8.84 | 8.34 | 8.61 | 145.05*** | 165.41*** | 153.99*** | 88.61** | 101.99*** | 95.02*** | 16.36 | 42.65** | 28.85** | 15.83 | -4.30 | 5.41 | -1.77 | 2.66 | 0.42 |
| RIB-16300 x RIB-192 | -11.03 | -1.84 | -6.96 | 118.80** | 128.64** | 123.00*** | 110.88** | 105.94** | 108.50*** | 80.67** | 56.31** | 68.30*** | 71.08** | 55.19** | 63.04*** | 10.21 | 18.64 | 14.33** |
| RIB-16324 x J-2340 | 59.01* | 54.29* | 56.77** | 71.07** | 53.38* | 62.83** | 2.90 | 20.86 | 10.70 | 1.00 | 8.54 | 4.39 | 2.28 | 36.99* | 18.03* | -1.05 | 3.26 | 1.08 |
| RIB-16324 x 20K86 | 62.01* | 66.29** | 63.99*** | 178.67*** | 154.45*** | 167.02*** | 56.06* | 70.32** | 62.73*** | -18.74* | -0.29 | -10.09 | 10.61 | 32.49* | 20.89* | -13.02 | -9.32 | -11.19* |
| RIB-16324 x RIB-192 | 202.80*** | 209.52*** | 205.75*** | 163.28*** | 138.53*** | 151.46*** | -11.72 | 3.68 | -4.51 | -3.57 | -1.76 | -2.68 | 4.65 | 22.79 | 12.86 | -14.53 | -8.20 | -11.44* |
| J-2340 x 20K86 | 89.80** | 87.68** | 88.81*** | 97.69** | 123.01** | 108.29*** | 2.80 | 15.22 | 8.47 | 4.85 | 5.71 | 5.25 | 28.73* | 17.63 | 23.19** | 12.83 | 14.40 | 13.62* |
| J-2340 x RIB-192 | -1.19 | 12.43 | 4.77 | 133.36** | 163.14*** | 145.30*** | 84.71** | 97.90** | 90.70*** | 14.00 | 14.88 | 14.43 | 12.90 | 11.86 | 12.39 | -1.29 | -4.30 | -2.78 |
| 20K86 x RIB-192 | 27.15 | 51.92* | 37.82** | -4.34 | -7.47 | -5.67 | -23.93 | -36.26* | -29.97* | -24.04 | -27.32* | -25.70** | -12.31 | -16.24 | -14.27 | -3.11 | -6.09 | -4.59 |

**Table S5b.** Better-parent heterosis (BPH %) for all 45 F₁ crosses in pearl millet

| **Cross** | **DF** | | | **DM** | | | **PH** | | | **Tillers** | | | **PL** | | | **PG** | | | **TW** | | |
| --- | --- | --- | --- | --- | --- | --- | --- | --- | --- | --- | --- | --- | --- | --- | --- | --- | --- | --- | --- | --- | --- |
|  | **E1** | **E2** | **Pooled** | **E1** | **E2** | **Pooled** | **E1** | **E2** | **Pooled** | **E1** | **E2** | **Pooled** | **E1** | **E2** | **Pooled** | **E1** | **E2** | **Pooled** | **E1** | **E2** | **Pooled** |
| RIB-9178 x RIB-9184 | 2.50 | -0.64 | 0.95 | -0.16 | -0.34 | -0.25 | 2.00 | -1.39 | 0.31 | -32.95 | -42.41** | -37.90** | -0.74 | -1.77 | -1.25 | -16.66* | 7.84 | -5.78 | 2.18 | -10.87 | -3.51 |
| RIB-9178 x RIB-9185 | -1.22 | 0.67 | 0.32 | -2.52 | 7.28 | 2.08 | -3.67 | 3.11 | -0.29 | -25.25 | -43.55** | -35.58** | -15.16 | -21.88** | -18.59*** | -10.90 | -11.70 | -4.52 | -22.41* | 3.43 | -10.21 |
| RIB-9178 x RIB-9205 | -11.11 | -13.42* | -12.25* | -9.54 | -17.96* | -11.49* | -2.33 | -2.33 | -2.33 | -28.34 | -23.10* | -25.71* | 4.63 | 34.24* | 17.26** | -13.72 | 20.11* | 1.29 | 30.54* | 38.36* | 34.21** |
| RIB-9178 x RIB-15131 | -17.10* | -12.35* | -14.88*** | -13.90* | -8.67 | -11.44** | 10.43 | 6.75 | 8.60 | 47.87* | 9.89 | 29.59* | -3.47 | 24.71* | 8.55 | 9.20 | -2.17 | 7.32 | 8.26 | 19.52 | 13.70 |
| RIB-9178 x RIB-16300 | -7.84 | -15.09* | -9.80* | -6.33 | -12.39 | -7.64 | 21.63* | 3.98 | 12.72* | -3.55 | 0.99 | -1.35 | -5.47 | 9.95 | 5.03 | 0.50 | 28.75** | 13.04* | 15.35 | 0.77 | 7.54 |
| RIB-9178 x RIB-16324 | -7.34 | -7.14 | -7.25 | -4.56 | -5.15 | -4.85 | 42.28** | 43.20** | 42.73*** | -9.64 | -4.50 | -7.24 | -8.86 | 13.93 | 0.86 | -7.59 | 20.08* | 4.69 | 15.27 | 30.01* | 22.19* |
| RIB-9178 x J-2340 | -18.64* | -17.37** | -18.02*** | -14.77* | -12.75* | -13.79** | 23.45* | 24.51* | 23.97** | 4.82 | 9.43 | 7.18 | 19.25* | 40.62** | 32.30*** | 1.35 | 6.98 | 5.78 | 30.05* | 24.44* | 27.42** |
| RIB-9178 x 20K86 | -17.14* | -16.97* | -17.06*** | -13.74* | -11.15 | -12.50** | 28.66* | 27.78* | 28.23*** | -4.35 | -8.07 | -6.18 | -5.50 | 1.13 | 6.00 | -11.27 | -6.18 | -5.69 | 20.98 | 21.95* | 21.46* |
| RIB-9178 x RIB-192 | -10.91 | -11.32* | -11.11* | -8.43 | -7.85 | -8.15 | 22.09* | 16.41 | 19.24** | -12.31 | 20.72 | 1.33 | -2.74 | 6.33 | 1.44 | -1.46 | 17.49* | 6.95 | 58.62** | 17.31 | 39.07*** |
| RIB-9184 x RIB-9185 | -22.56** | -17.31* | -18.99*** | -19.52* | -13.25* | -15.99** | -2.69 | -4.68 | -3.68 | -7.09 | -17.14 | -10.20 | 8.42 | -2.89 | 4.20 | -8.41 | -28.14** | -18.87** | -14.83 | 3.04 | -6.39 |
| RIB-9184 x RIB-9205 | -26.88** | -21.15** | -24.05*** | -23.79** | -21.57** | -19.94*** | -3.84 | -11.80 | -7.82 | 10.70 | 1.22 | 6.47 | -5.45 | -3.37 | -4.43 | -3.42 | -1.23 | -2.14 | 5.45 | 12.18 | 8.39 |
| RIB-9184 x RIB-15131 | -19.69** | -13.53* | -16.80*** | -15.55* | -9.07 | -12.50** | 8.38 | 0.24 | 4.34 | -11.80 | -7.16 | -9.01 | -11.63 | -13.88* | -12.74** | -3.01 | -4.25 | -3.62 | -7.27 | 36.77** | 12.49 |
| RIB-9184 x RIB-16300 | -23.13** | -6.29 | -13.92** | -20.16* | -16.97* | -17.23** | 7.65 | -5.59 | 1.04 | -7.10 | 0.82 | -3.26 | 5.32 | 4.51 | 4.92 | -5.06 | -5.18 | -5.11 | 1.09 | -8.52 | 3.47 |
| RIB-9184 x RIB-16324 | -34.46** | -26.79** | -30.72*** | -28.52** | -21.25** | -24.99*** | 6.38 | 5.91 | 6.14 | 1.61 | 4.71 | 6.76 | -6.29 | -3.24 | -4.79 | -8.67 | 6.78 | -1.08 | 6.55 | 17.36 | 11.26 |
| RIB-9184 x J-2340 | -8.47 | -25.15** | -16.57*** | -6.82 | -6.88 | -6.85 | -4.55 | 11.38 | 3.41 | -10.92 | -4.54 | -7.58 | -13.32 | -15.03* | -14.16** | -22.90* | -17.38* | -20.25** | -26.91* | 23.47* | -4.94 |
| RIB-9184 x 20K86 | -18.29* | -16.36* | -17.35*** | -15.65* | -9.48 | -12.70** | 27.32* | 21.96* | 24.65*** | -12.45 | -8.38 | -10.32 | -12.38 | -11.06 | -11.73** | -18.31* | -22.18* | -20.21*** | -9.82 | -10.87 | -10.27 |
| RIB-9184 x RIB-192 | -8.48 | -11.32* | -9.88* | -6.83 | -14.12* | -10.40* | 18.03 | 13.20 | 15.62* | -10.33 | 6.11 | 3.16 | 17.26* | 19.83* | 20.94*** | -0.00 | 7.49 | 3.76 | -4.36 | 3.25 | -1.05 |
| RIB-9185 x RIB-9205 | -21.34** | -12.24* | -17.04** | -18.73* | -7.54 | -8.20 | -14.81 | -10.60 | -12.71* | 60.43** | 20.75* | 47.87** | -11.72 | -19.56* | -15.72** | -6.05 | -16.52* | -11.60* | -10.34 | -3.13 | -6.94 |
| RIB-9185 x RIB-15131 | -15.54* | -4.71 | -10.47** | -12.72* | -13.44* | -13.06** | 11.62 | 13.77 | 12.69* | -26.23 | -29.56* | -23.64 | -3.18 | -10.51 | -6.92 | 12.91 | 1.50 | 11.42* | -10.34 | -6.59 | -8.57 |
| RIB-9185 x RIB-16300 | -7.93 | -11.95* | -6.43 | -7.57 | -8.23 | -4.39 | 5.72 | 2.60 | 4.17 | -10.49 | 6.92 | 0.32 | -5.10 | -13.69* | -9.48* | 8.57 | -10.88 | -1.74 | 1.03 | -8.90 | -3.66 |
| RIB-9185 x RIB-16324 | -13.56* | -14.29* | -13.91** | -9.89 | -9.98 | -9.93* | 5.89 | -8.91 | -1.49 | 5.18 | 11.48 | 15.17 | -10.06 | -16.63* | -13.41** | 0.75 | -6.64 | -3.17 | -4.14 | 1.89 | -1.29 |
| RIB-9185 x J-2340 | -18.08* | -15.57* | -16.86*** | -14.39* | -11.14 | -12.82** | -0.84 | -16.69* | -8.75 | 22.20 | -36.64** | -11.00 | -3.69 | -10.76 | -7.30 | -10.10 | -18.74* | -11.11* | -17.24 | 13.06 | -2.93 |
| RIB-9185 x 20K86 | -12.57* | -13.33* | -12.94** | -9.54 | -6.16 | -7.92 | -3.87 | -23.97* | -13.89* | 18.13 | -15.25 | -0.71 | 1.15 | -3.79 | -1.37 | -7.58 | -13.22 | -8.80 | -25.52* | -3.89 | -15.30* |
| RIB-9185 x RIB-192 | -9.09 | -9.43 | -9.26* | -4.78 | -5.35 | -4.67 | 3.37 | 4.29 | 3.83 | -14.29 | -8.33 | -1.25 | 7.22 | 9.78 | 13.25** | -10.63 | -24.51** | -17.99** | -14.14 | -21.61* | -17.67* |
| RIB-9205 x RIB-15131 | -26.42** | -20.59** | -23.69*** | -21.20** | -14.64* | -18.11*** | -4.27 | -4.98 | -4.62 | -21.97 | -0.18 | -11.39 | 32.54* | 34.29* | 33.40*** | 3.11 | -7.25 | -1.94 | -6.52 | 9.27 | 1.10 |
| RIB-9205 x RIB-16300 | -8.16 | -18.87** | -13.73** | -6.58 | -12.35* | -8.83* | -11.20 | 11.61 | 0.32 | 33.18* | 45.56** | 39.17** | 6.92 | 1.54 | 4.28 | -5.21 | -3.23 | -4.25 | 15.35 | -18.62* | -2.83 |
| RIB-9205 x RIB-16324 | -19.77** | -17.86** | -18.84*** | -15.21* | -17.56* | -16.19** | 34.09* | 48.10** | 41.03*** | 107.66*** | 71.96*** | 89.72*** | 31.95* | 37.62* | 34.62*** | 10.43 | 5.18 | 7.83 | 44.19* | 38.96* | 42.45** |
| RIB-9205 x J-2340 | -21.47** | -21.56** | -21.51*** | -16.67* | -16.36* | -16.52*** | 12.79 | 12.90 | 12.85* | 37.61* | 26.98* | 32.27* | 10.71 | 17.22 | 13.70* | 2.43 | -0.74 | 0.91 | 30.86 | 43.14** | 37.09** |
| RIB-9205 x 20K86 | -21.14** | -20.00** | -20.59*** | -17.56* | -4.73 | -9.71* | 22.65* | 26.92* | 24.71** | 44.03* | 53.44** | 48.76** | 12.19 | -4.52 | 3.41 | -11.63 | -12.67 | -12.14* | 0.00 | -7.38 | -3.69 |
| RIB-9205 x RIB-192 | -8.48 | -11.32* | -9.88* | -6.83 | -5.53 | -4.26 | -3.91 | -12.27 | -8.11 | 30.13* | 52.38** | 48.17*** | -1.71 | 8.23 | 2.86 | -4.26 | -11.35 | -7.82 | 8.50 | -4.51 | 1.97 |
| RIB-15131 x RIB-16300 | -19.17** | -14.12* | -16.80*** | -16.25* | -8.67 | -12.69** | 0.68 | 0.58 | 0.63 | -23.15 | 1.48 | -11.23 | -1.90 | -5.06 | -3.45 | -3.01 | -6.30 | -4.61 | -0.87 | -18.62* | -7.16 |
| RIB-15131 x RIB-16324 | -15.03* | -10.00 | -12.67** | -11.31 | -11.45 | -11.38** | -11.62 | -5.68 | -8.68 | -31.64* | -13.60 | -22.96 | 21.91 | 15.49 | 18.75* | 2.84 | 2.83 | 2.83 | -3.91 | 2.28 | -0.92 |
| RIB-15131 x J-2340 | -6.74 | -10.00 | -8.26* | -5.65 | -1.51 | -3.70 | -2.39 | -16.81* | -9.54 | -35.25* | -30.21* | -32.82* | 11.80 | 14.20 | 12.91* | 14.27 | -2.96 | 5.87 | -15.22 | -5.17 | -10.37 |
| RIB-15131 x 20K86 | -6.22 | -5.29 | -5.79 | -4.24 | -3.10 | -3.70 | 1.20 | 0.93 | 1.07 | -6.56 | 17.49 | 5.02 | 5.73 | -14.27 | -4.77 | 4.86 | 7.29 | 6.05 | -26.96* | -6.10 | -16.89* |
| RIB-15131 x RIB-192 | 1.55 | 7.65 | 4.41 | 1.06 | -9.86 | -4.08 | 4.79 | 7.37 | 6.07 | -19.80 | 12.54 | 0.00 | -7.09 | 0.27 | -3.70 | -10.22 | -12.54 | -11.35* | -13.04 | -27.07* | -19.82* |
| RIB-16300 x RIB-16324 | -11.86* | -14.29* | -13.04** | -9.89 | -0.32 | -5.24 | -6.28 | -12.60 | -9.47 | -14.81 | -14.47 | -14.65 | 11.07 | 10.59 | 10.84 | 13.47 | 9.45 | 11.52* | -5.12 | -17.81* | -11.91 |
| RIB-16300 x J-2340 | -9.60 | -10.18 | -9.88* | -8.71 | -5.93 | -7.36 | 8.35 | 0.02 | 4.15 | -45.37* | -47.37** | -46.34*** | 12.11 | 24.06* | 18.57** | 3.25 | 4.47 | 3.84 | 5.58 | -16.60 | -6.29 |
| RIB-16300 x 20K86 | -7.43 | -9.70 | -8.53* | -5.73 | -3.66 | -4.74 | 22.01* | 10.12 | 16.01* | 14.35 | -43.09** | -13.46 | 12.98 | 3.03 | 9.67 | 5.65 | 1.88 | 3.80 | 2.33 | -18.21* | -8.67 |
| RIB-16300 x RIB-192 | -12.73* | -11.32* | -12.04** | -10.84 | -9.07 | -9.79* | 7.15 | 2.28 | 4.70 | -27.86* | -12.66 | -17.12 | -12.46 | -0.99 | -7.18 | 10.25 | 13.74 | 11.94* | 6.05 | -11.75 | -3.48 |
| RIB-16324 x J-2340 | -11.94* | -14.29* | -13.08** | -10.23 | -10.34 | -10.28* | 21.12* | 22.27* | 21.68** | 3.21 | -2.66 | 0.48 | 17.86 | 33.03** | 24.83*** | 10.47 | 6.83 | 8.72 | 52.91** | 31.53* | 42.45** |
| RIB-16324 x 20K86 | -5.65 | -5.36 | -5.51 | -3.24 | -3.14 | -3.19 | 28.63* | 34.26* | 31.35*** | 85.71** | -5.11 | 43.37** | 5.91 | -9.44 | -2.15 | -0.25 | -4.11 | -2.14 | 0.00 | 20.48 | 10.23 |
| RIB-16324 x RIB-192 | 2.82 | -2.38 | 0.29 | 3.42 | 8.94 | 6.10 | 20.11* | 16.39 | 18.24** | 21.64 | 3.22 | 14.04 | -8.57 | 4.30 | -2.65 | 14.10 | 5.23 | 9.64 | -12.50 | -6.00 | -9.24 |
| J-2340 x 20K86 | 1.69 | -2.99 | -0.58 | 2.27 | -0.72 | 0.82 | 20.35* | 20.64* | 20.49** | 75.36** | -11.25 | 32.60* | 28.73* | 33.40** | 38.67*** | 20.44* | 15.66* | 18.09** | 11.71 | -18.62 | -3.44 |
| J-2340 x RIB-192 | 4.80 | -1.20 | 1.89 | 3.03 | 0.88 | 1.99 | 20.48* | 12.77 | 16.61** | 21.92 | -5.43 | 10.63 | 7.09 | 17.63* | 11.94** | 2.71 | 3.86 | 3.26 | 30.50* | 10.86 | 20.64* |
| 20K86 x RIB-192 | -18.86* | -16.36* | -17.65*** | -16.03* | -10.73 | -13.49** | 9.31 | 7.99 | 8.64 | -25.60* | 0.00 | -15.03 | -22.86** | -17.64* | -20.46*** | 3.42 | -8.82 | -2.59 | 27.32* | 22.92* | 25.12** |

**, **, *** Significant at P<0.05, P<0.01, and P<0.001, respectively; BPH = [(F₁ - BP)/BP] × 100 (Heterobeltiosis)*

**Table S5b.** *(Continued)*

| **Cross** | **DFY** | | | **GY** | | | **HI** | | | **Fe** | | | **Zn** | | | **Protein** | | |
| --- | --- | --- | --- | --- | --- | --- | --- | --- | --- | --- | --- | --- | --- | --- | --- | --- | --- | --- |
|  | **E1** | **E2** | **Pooled** | **E1** | **E2** | **Pooled** | **E1** | **E2** | **Pooled** | **E1** | **E2** | **Pooled** | **E1** | **E2** | **Pooled** | **E1** | **E2** | **Pooled** |
| RIB-9178 x RIB-9184 | -22.59 | -23.84* | -23.18* | 37.30* | 31.47 | 42.68* | -24.44* | -33.43** | -28.91** | 1.47 | 1.89 | 1.68 | 2.93 | 1.33 | 2.16 | -5.23 | -3.59 | -4.43 |
| RIB-9178 x RIB-9185 | 10.15 | -15.64 | -3.68 | 29.38 | -3.85 | 20.32 | -26.26* | -36.84** | -31.52*** | 11.38 | 0.39 | 8.60 | 6.03 | 2.36 | 4.60 | -3.63 | -3.76 | -2.85 |
| RIB-9178 x RIB-9205 | 88.78* | 89.93* | 89.31** | 3.72 | -16.88 | -5.81 | -38.77** | -49.96** | -44.33*** | -12.39 | -14.84* | -13.56* | -4.26 | -8.02 | -2.97 | -8.57 | -7.09 | -7.85 |
| RIB-9178 x RIB-15131 | 136.67*** | 131.00*** | 134.02*** | 101.77** | 78.42** | 90.96*** | -44.53** | -49.50** | -47.00*** | -12.04 | -11.18 | -11.07 | -8.66 | -13.30 | -5.58 | -9.56 | -8.02 | -8.81* |
| RIB-9178 x RIB-16300 | 33.68 | -1.93 | 16.73 | 49.27* | 35.16* | 43.95* | -34.21* | -28.33* | -31.29*** | -9.58 | -11.15 | -10.34 | 2.73 | 14.51 | 7.96 | -21.50* | -20.29* | -20.91*** |
| RIB-9178 x RIB-16324 | 92.09** | 91.73** | 91.92*** | 66.74** | 31.63* | 58.46** | -48.33** | -53.64** | -50.97*** | -10.83 | -18.21* | -14.39* | 6.70 | 20.73 | 12.93 | -8.81 | -7.34 | -8.09 |
| RIB-9178 x J-2340 | 181.48*** | 163.47*** | 172.80*** | 76.50** | 74.03** | 75.36*** | -42.28** | -43.25** | -42.76*** | -22.34* | -24.43** | -23.35** | 4.26 | 32.75* | 16.91* | 6.01 | 9.10 | 8.87 |
| RIB-9178 x 20K86 | 20.25 | 62.77* | 39.63* | 7.20 | -6.99 | 1.15 | -35.79* | -59.29*** | -47.48*** | -5.96 | -13.50 | -9.60 | -10.43 | 5.64 | -1.96 | -12.64 | -10.60 | -10.35* |
| RIB-9178 x RIB-192 | 93.03** | 143.64*** | 113.75*** | 47.73* | 24.18 | 36.83* | -59.05** | -65.39*** | -62.20*** | -32.22** | -30.04** | -31.17*** | -15.21 | 2.95 | -7.15 | -4.18 | 1.06 | -1.63 |
| RIB-9184 x RIB-9185 | 23.39 | 22.45 | 22.95* | 29.57 | 18.46 | 40.41* | -4.99 | -15.49 | -10.35 | 11.32 | -11.51 | -0.57 | 5.99 | 9.55 | 7.70 | -3.83 | 1.51 | -1.23 |
| RIB-9184 x RIB-9205 | -37.71* | -6.25 | -22.89* | 9.42 | 25.59 | 15.82 | -18.02 | -40.66** | -28.38** | 20.31* | 16.42* | 18.45** | 9.05 | -2.88 | 3.32 | -3.46 | -1.98 | -2.74 |
| RIB-9184 x RIB-15131 | -4.37 | -41.44** | -21.84* | 63.24** | 97.16** | 76.66*** | 30.81 | 84.71** | 57.09*** | -2.16 | 3.91 | 0.64 | 11.97 | 9.65 | 10.86 | 11.18 | 13.00 | 12.07* |
| RIB-9184 x RIB-16300 | -8.49 | -9.17 | -8.81 | -16.13 | -14.40 | -13.84 | -27.86 | -27.81 | -27.84* | -4.51 | 2.95 | -0.77 | -3.98 | -0.06 | -2.10 | -6.17 | -4.75 | -5.48 |
| RIB-9184 x RIB-16324 | -9.82 | -8.99 | -9.43 | -17.66 | -34.45* | -15.99 | -17.48 | -17.26 | -17.38 | 2.90 | -3.36 | 2.93 | 8.04 | -0.77 | 3.81 | 3.17 | 4.80 | 3.97 |
| RIB-9184 x J-2340 | 53.63** | 54.40** | 54.00*** | 0.37 | 11.61 | 4.82 | -62.97** | -59.31** | -61.40*** | 30.28* | 15.66* | 22.95** | 10.15 | 1.37 | 5.93 | -20.64* | -19.54* | -20.10*** |
| RIB-9184 x 20K86 | 20.96 | 17.74 | 19.44* | -0.11 | -4.45 | -1.82 | -44.22* | -49.15** | -46.62*** | 14.96 | 5.48 | 12.28 | 11.65 | 5.49 | 8.70 | -10.37 | -9.04 | -9.72* |
| RIB-9184 x RIB-192 | 19.16 | 16.22 | 17.77* | 77.26** | 104.03** | 87.85*** | 42.20 | 42.99* | 52.12** | -4.88 | 1.00 | -1.93 | -10.10 | -6.55 | -8.40 | 7.38 | 13.54 | 10.38* |
| RIB-9185 x RIB-9205 | 56.17* | 19.49 | 36.50** | 113.40** | 46.63* | 77.97*** | -19.63 | -14.51 | -17.29* | 9.53 | -8.02 | 4.61 | 2.35 | 8.21 | 5.68 | 10.98 | 12.19 | 12.45* |
| RIB-9185 x RIB-15131 | 13.55 | -8.59 | 2.63 | 143.88*** | 20.30 | 89.74*** | 134.93*** | 34.39* | 85.91*** | -14.96 | -3.97 | -4.67 | -5.67 | -3.52 | 0.27 | -19.05* | -16.94 | -18.02*** |
| RIB-9185 x RIB-16300 | 120.65*** | 95.28*** | 116.98*** | 81.87** | 49.61* | 78.15*** | -15.02 | -16.10 | -15.50 | -9.84 | -14.66* | -12.35* | 7.83 | 1.75 | 5.01 | -19.57* | -17.51 | -18.57** |
| RIB-9185 x RIB-16324 | 65.54** | 42.43* | 62.43*** | 68.61* | 111.02*** | 91.42*** | 2.00 | 59.03** | 31.81* | -7.79 | -22.28** | -15.34* | 21.82* | 19.19 | 20.59** | -3.22 | -3.78 | -2.13 |
| RIB-9185 x J-2340 | -27.10 | -44.06* | -36.20** | 83.55** | 35.87* | 70.98** | 56.36** | 79.48** | 66.31*** | -8.04 | -17.09* | -12.76* | 3.65 | 1.81 | 2.79 | -6.99 | -10.12 | -8.56 |
| RIB-9185 x 20K86 | 36.88 | 3.01 | 18.72 | 51.81* | 30.10 | 50.62** | 9.10 | 3.83 | 6.54 | 15.28 | -8.46 | 2.92 | 6.01 | 5.41 | 5.73 | -7.38 | -10.49 | -8.94 |
| RIB-9185 x RIB-192 | 35.70* | 33.20* | 51.10*** | 74.55** | 27.21 | 49.43* | 12.29 | 1.38 | 6.73 | -15.13 | -16.93* | -16.07** | -7.69 | 4.95 | -1.82 | 5.79 | 2.33 | 4.05 |
| RIB-9205 x RIB-15131 | -19.27 | -19.73 | -19.49 | 26.77 | 37.91 | 31.58 | -4.49 | 8.52 | 1.46 | 10.80 | 13.42 | 12.99* | 20.78* | 9.55 | 18.36* | -23.73* | -21.79* | -22.79*** |
| RIB-9205 x RIB-16300 | -14.93 | -17.94 | -16.36 | 29.44 | 26.06 | 27.95 | -7.82 | -1.63 | -4.99 | 15.15 | 9.79 | 12.59* | -2.69 | -0.60 | -1.69 | -9.93 | -7.20 | -8.60 |
| RIB-9205 x RIB-16324 | 64.54** | 68.86** | 66.56*** | 79.37** | 28.03 | 52.30** | -39.09* | -35.52* | -37.46*** | 1.14 | 1.66 | 1.39 | 22.00* | 7.50 | 15.02* | -11.52 | -8.92 | -10.25* |
| RIB-9205 x J-2340 | 150.77** | 133.44** | 142.42*** | 32.30 | 48.04* | 38.55 | -46.58** | -45.18** | -45.94*** | 20.91* | 19.88* | 20.42** | 5.34 | 6.13 | 5.72 | 19.28* | 16.86 | 18.55** |
| RIB-9205 x 20K86 | -17.25 | -0.48 | -9.61 | 28.33 | 17.81 | 23.73 | 8.48 | -3.21 | 3.14 | 45.32** | 35.00** | 40.39*** | 20.27* | 8.13 | 14.43* | -3.81 | -6.30 | -4.87 |
| RIB-9205 x RIB-192 | 16.70 | 42.26* | 27.16* | 45.10 | 25.63 | 38.14 | -46.27** | -49.64** | -47.81*** | -14.19 | -23.98** | -18.87** | 6.66 | 1.37 | 4.11 | 5.87 | 9.13 | 7.46 |
| RIB-15131 x RIB-16300 | 28.82 | 26.29 | 27.61* | 53.65* | 46.04* | 50.29** | 17.13 | 12.24 | 15.41 | -9.55 | -14.26 | -11.72* | -7.21 | -9.01 | -8.14 | -7.84 | -5.00 | -6.45 |
| RIB-15131 x RIB-16324 | -12.39 | -26.65 | -19.06 | 72.13** | 25.74 | 55.45** | 74.29** | 85.03** | 79.52*** | -25.45* | -23.25* | -24.43*** | -15.65 | -19.98 | -17.90* | -9.86 | -7.10 | -8.51 |
| RIB-15131 x J-2340 | 68.94** | 66.18** | 67.65*** | 20.48 | 10.19 | 19.02 | -43.78* | -41.40* | -42.76*** | -7.91 | -6.97 | -7.47 | 7.64 | -14.10 | -3.64 | -20.52* | -18.16* | -19.37*** |
| RIB-15131 x 20K86 | 9.58 | 10.78 | 10.14 | 11.74 | 9.96 | 10.96 | -0.27 | -6.66 | -3.37 | -3.22 | 1.54 | -1.02 | 6.40 | -7.56 | -0.84 | -11.33 | -8.62 | -10.01* |
| RIB-15131 x RIB-192 | 45.65* | 82.83** | 61.40*** | 11.96 | 14.34 | 12.99 | -30.26 | -34.59* | -32.37* | -5.68 | -6.05 | -5.85 | -14.58 | -27.62* | -21.34** | -26.68* | -24.55* | -25.64*** |
| RIB-16300 x RIB-16324 | -28.70 | -31.92 | -30.23* | 2.81 | -25.53 | -4.83 | 36.71 | 22.01 | 29.79* | 16.95 | 16.15 | 16.58* | 0.94 | 7.72 | 14.28 | 0.59 | 3.71 | 2.11 |
| RIB-16300 x J-2340 | -6.54 | -11.85 | -9.06 | 38.93* | 38.44* | 38.71* | -1.74 | 21.95 | 8.45 | 20.09 | 27.13* | 23.40* | 14.86 | 6.98 | 13.71 | -8.00 | -5.20 | -6.63 |
| RIB-16300 x 20K86 | 0.85 | -3.18 | -1.07 | 141.57*** | 163.90*** | 151.33*** | 74.55** | 82.02*** | 78.18*** | -2.77 | 17.52* | 6.94 | 6.38 | -9.41 | -1.68 | -6.55 | 0.52 | -3.10 |
| RIB-16300 x RIB-192 | -15.00 | -9.80 | -8.16 | 87.37** | 84.89** | 86.28*** | 77.29** | 81.24** | 79.15*** | 61.36** | 50.43** | 61.98*** | 68.38** | 45.18** | 58.76*** | 3.77 | 11.70 | 7.64 |
| RIB-16324 x J-2340 | 30.27 | 29.34 | 29.84* | 60.34* | 28.45 | 54.39** | -17.11 | -0.87 | -10.12 | -16.45 | -13.44 | -15.07* | -5.06 | 30.80* | 15.63 | -2.07 | 1.28 | 0.63 |
| RIB-16324 x 20K86 | 53.04* | 53.65* | 53.32*** | 149.37*** | 139.31*** | 159.09*** | 35.54* | 37.81* | 36.64** | -18.93* | -3.92 | -11.54 | 8.95 | 14.38 | 13.37 | -13.73 | -11.24 | -11.76* |
| RIB-16324 x RIB-192 | 183.70*** | 194.42*** | 201.12*** | 147.08*** | 83.39** | 113.50*** | -21.13 | 2.98 | -10.49 | -26.46* | -13.77 | -20.64** | -3.83 | 18.74 | 9.28 | -16.15 | -9.94 | -13.12* |
| J-2340 x 20K86 | 63.05* | 68.73** | 65.64*** | 88.10** | 96.93** | 91.96*** | -5.98 | 13.24 | 4.03 | -13.10 | -17.99* | -15.44* | 21.19 | 5.80 | 13.34 | 12.60 | 14.16 | 13.38* |
| J-2340 x RIB-192 | -23.03 | -1.64 | -14.27 | 106.17** | 136.39** | 118.16*** | 36.76* | 61.45** | 47.38*** | 2.74 | 2.67 | 14.10 | 11.69 | 10.40 | 11.07 | -2.16 | -7.87 | -5.04 |
| 20K86 x RIB-192 | 12.97 | 47.34* | 27.04* | -19.05 | -25.50 | -21.87 | -39.91* | -48.69** | -44.17** | -41.98** | -38.21** | -40.17*** | -18.28 | -25.53* | -21.98** | -4.17 | -9.78 | -6.99 |
